# Supplementary material for: Association between preoperative anaemia with length of hospital stay among patients undergoing primary total knee arthroplasty in Singapore: a single-centre retrospective study
Source: PubMed Central journal article supplement — BMJ Open. 2017 Jun 8;7(6):e016403. doi: 10.1136/bmjopen-2017-016403 (PMC5726141; doi:10.1136/bmjopen-2017-016403), 2017-06-08
Supplement: bmjopen-2017-016403.draft_revisions.pdf [file bmjopen-2017-016403.draft_revisions.pdf]

# BMJ Open

## Association between preoperative anaemia with length of hospital stay among patients undergoing primary total knee arthroplasty: A single centre retrospective study

|                                 |                                                                                                                                                                                                                                                                                                                                                                                                                                                                                                                                  |
|---------------------------------|----------------------------------------------------------------------------------------------------------------------------------------------------------------------------------------------------------------------------------------------------------------------------------------------------------------------------------------------------------------------------------------------------------------------------------------------------------------------------------------------------------------------------------|
| Journal:                        | <i>BMJ Open</i>                                                                                                                                                                                                                                                                                                                                                                                                                                                                                                                  |
| Manuscript ID                   | bmjopen-2017-016403                                                                                                                                                                                                                                                                                                                                                                                                                                                                                                              |
| Article Type:                   | Research                                                                                                                                                                                                                                                                                                                                                                                                                                                                                                                         |
| Date Submitted by the Author:   | 11-Feb-2017                                                                                                                                                                                                                                                                                                                                                                                                                                                                                                                      |
| Complete List of Authors:       | abdullah, hairil; Singapore General Hospital, Department of Anesthesiology<br>Sim, Eileen; Singapore General Hospital, Department of Anaesthesiology<br>Ying, Hao; Singapore General Hospital, Health Services Research Unit<br>Lin, Gengyu; National University Singapore Yong Loo Lin School of Medicine<br>Liew, Geoffrey ; Singapore General Hospital, Department of Anaesthesiology<br>Lamoureux, Ecosse; Singapore Eye Research Institute<br>Tan, Mann Hong; Singapore General Hospital, Department of Orthopaedic Surgery |
| <b>Primary Subject Heading</b>: | Health services research                                                                                                                                                                                                                                                                                                                                                                                                                                                                                                         |
| Secondary Subject Heading:      | Haematology (incl blood transfusion), Surgery, Anaesthesia                                                                                                                                                                                                                                                                                                                                                                                                                                                                       |
| Keywords:                       | Anaesthesia in orthopaedics < ANAESTHETICS, ORTHOPAEDIC & TRAUMA SURGERY, Orthopaedic & trauma surgery < SURGERY, Anaemia < HAEMATOLOGY, Blood bank & transfusion medicine < HAEMATOLOGY, HEALTH SERVICES ADMINISTRATION & MANAGEMENT                                                                                                                                                                                                                                                                                            |
|                                 |                                                                                                                                                                                                                                                                                                                                                                                                                                                                                                                                  |

SCHOLARONE™  
Manuscripts

**Title:** Association between preoperative anaemia with length of hospital stay among patients undergoing primary total knee arthroplasty: A single centre retrospective study  
**Short Title:** Preoperative anaemia, total knee arthroplasty

**Running Head:**

Abdullah HR, Sim YE, Y Hao, Lin GY, Liew GHC, EL Lamoureux, Tan MH

Hairil Rizal ABDULLAH (Corresponding author)

Department of Anesthesiology,  
Singapore General Hospital  
169608, Singapore  
Hairil.rizal.abdullah@singhealth.com.sg

Yilin Eileen SIM

Department of Anesthesiology  
Singapore General Hospital,  
169608, Singapore

Ying HAO

Health Services Research Unit,  
Singapore General Hospital  
169608, Singapore

Geng Yu LIN

Yong Loo Lin School of Medicine,  
National University of Singapore

Geoffrey Haw Chieh LIEW

Department of Anesthesiology  
Singapore General Hospital  
169608, Singapore

Ecosse L LAMOUREUX

Duke-NUS Medical School  
169857, Singapore

Mann Hong TAN

Department of Orthopaedics  
Singapore General Hospital  
169608, Singapore

Details of corresponding author

Email: Hairil.rizal.abdullah@singhealth.com.sg

Key words: Anemia; Arthroplasty, knee replacement; length of stay;

Number of Tables: 3

Conflict of Interest: None to declare

Financial support: None

## Cover Letter

Dear Editor-In-Chief of BMJ Open,

We are writing to resubmit an original article titled, "**Association between preoperative anaemia with length of hospital stay among patients undergoing primary total knee arthroplasty: A single centre retrospective study**". We had previously submitted this article under the same title to your esteemed journal under the ID number (bmjopen-2016-015294), however it was rejected with the offer to resubmit.

We would like to thank both Dr Michael Gillies and Professor Toby Richards for their time in reviewing our original manuscript and providing invaluable comments. We have addressed their concerns in this revision. Please allow us to present a point-by-point reply to the comments in the supplementary information file at the end of our manuscript.

Our manuscript describe the results of a retrospective cohort study of 2600 patients who underwent primary Total Knee Arthroplasty in Singapore General Hospital, one of the largest public hospital in Singapore, between January 2013 and June 2014.

This study is the first study from Singapore, and from South East Asia region, that examines the relationship between preoperative anaemia and hospital length of stay, readmission and perioperative blood transfusion in patients who had undergone primary Total Knee Arthroplasty. Our study provides an estimate of the risk of preoperative anaemia on prolonged LOS and perioperative blood transfusion. These results would be helpful for health systems to analyse the cost-effectiveness of treating preoperative anemia as a prevention strategy. Our study is one of the first to control for the day of the week the surgery was done, which was recently found to be a significant predictor for LOS in arthroplasties. We believe that the results of this study would provide additional angles on perioperative anaemia and patient blood management.

This manuscript has not been published and is not under consideration for publication elsewhere. We have no conflicts of interest to disclose. All authors have approved and agree with submission. Thank you for receiving our manuscript and for considering it for peer-review. We appreciate your time and look forward to hearing from you.

Best regards,

Hairil Rizal, Abdullah

## Abstract

**Objectives:** Studies in western healthcare settings suggest that preoperative anaemia is associated with poor outcomes after elective surgery. We investigated the prevalence of preoperative anaemia among elective total knee arthroplasty patients in Singapore and its association with length of hospital stay (LOS), perioperative blood transfusion and hospital readmission rates.

**Methods:** Retrospective cohort study performed in a tertiary academic medical centre in Singapore. Data of patients who underwent TKA between January 2013 to June 2014, such as demographics, comorbidities, preoperative haemoglobin level, LOS and 30-day readmission data were collected. Anaemia severity was graded according to WHO classification. Multivariate logistic regression were performed to identify factors that predispose to prolonged LOS. Prolonged LOS was defined as more than 6 days, which corresponds to >75th centile LOS of the data.

**Results:** We analysed 2600 patients. The prevalence of anaemia was 23.5%. 434 patients (16.7%) had mild anaemia and 176 patients (6.8%) had moderate to severe anaemia. The mean LOS for all patients was 5.5±4.8 days. Based on multivariate logistic regression, preoperative anaemia significantly increased LOS (mild anaemia, aOR 1.59, p=0.001; moderate/severe anaemia, aOR 2.29, p<0.001). Transfusion of 1 unit red cell increased odds of prolonged LOS (aOR 1.98, p=0.006) and transfusion of 2 or more units had even higher odds of prolonged LOS (aOR 5.65, p<0.001). Bilateral TKR, repeat operation during hospital stay, previous CVA, general anaesthesia and age≥ 65 years were associated with prolonged LOS. There were 45 (1.7%) cases of related readmission within 30 days. Due to the low number, no statistical analysis for hospital readmission was done.

**Conclusion:** Anaemia is common among patients undergoing elective total knee arthroplasty in Singapore and is independently associated with prolonged length of stay and increased perioperative blood transfusion.

Word count: 296

Keywords: Anaemia; Arthroplasty, knee replacement; length of stay; perioperative blood transfusion

**Strengths:**

- Our study provides a unique perspective from a South East Asian healthcare system on anaemia and its impact on LOS and hospital readmission rates in Singapore.
- We had minimal incomplete data (2.0%) due to the rigorous mandatory preoperative assessment database.
- Our study is one of the first to control for the day of the week the surgery was done, which was recently found to be a significant predictor for LOS in arthroplasties.

**Limitations:**

- This is a retrospective observational study, so it cannot establish a causal relationship between preoperative anaemia and adverse outcomes
- The selection of the 75th centile for defining prolonged LOS can be viewed as an arbitrary cut-off, although it is also used in other literature examining LOS after elective surgery.

**Introduction**

The prevalence of preoperative anaemia in patients undergoing non-cardiac surgery is considerably high, with rates of 30.4% and 28.7% recorded in the US and Europe respectively.[1]. This is an important health problem as even mild anemia is associated with poor outcomes post-surgery [1, 3–6], including prolonged length of hospital stay (LOS) and higher readmission rates [7, 8] .

Total knee arthroplasty (TKA) is one of the most common orthopaedic procedures worldwide [2,3]. Due to the low mortality and morbidity rates associated with TKA, improvement initiatives have mainly focused on reducing LOS and improving functional recovery after surgery [4,5]. LOS associated with TKA is directly correlated with the total procedure cost, mainly due to provision of inpatient services [6,7]. Reductions in LOS can therefore help to reduce the economic burden of TKA [8,9]. Due to the fixed bed capacity, high overhead costs, and the Diagnosis-Related Group (DRG) reimbursement system in most health systems, the economic revenue of these systems depends on an increase in patient throughput by decreasing LOS. Hence, it is important for health systems and physicians to identify modifiable risk factors that are associated with the improved recovery and discharge of these patients. However, few

1  
2  
3 studies have investigated preoperative anemia in the specific context of elective primary TKAs,  
4 with a focus on LOS and readmission rates, which are important indicators of health services  
5 outcomes. Furthermore, of the studies focusing on the association between hospital LOS after  
6 joint arthroplasties and preoperative anaemia [10–17], most were conducted within the western  
7 world healthcare settings, with different demographics and potentially varying discharge and  
8 rehabilitation policies than other regions in the world.  
9  
10

11  
12 Therefore, in this study, we set out to investigate the relationship between preoperative  
13 anaemia and hospital LOS, perioperative blood transfusion as well as 30-day readmission rate  
14 among patients undergoing primary TKA in Singapore.  
15  
16

## 17 18 19 **Methods**

20 Institutional Review Board approval was obtained (Singhealth CIRB 2014/651/D) prior to  
21 the start of the study. We retrospectively analysed the electronic medical records of all 2676  
22 patients who underwent TKA between January 2013 and June 2014 in our institution. These  
23 clinical records were sourced from our institution's clinical information system (Sunrise Clinical  
24 Manager (SCM), Allscripts, IL, USA) and stored in our enterprise data repository and analytics  
25 system (SingHealth-IHiS Electronic Health Intelligence System - eHINTS), which integrates  
26 information from multiple healthcare transactional systems including administration, clinical and  
27 ancillary systems. We generated a list of patients who underwent total knee replacements from  
28 January 2013 to June 2014 using specific surgical codes relevant to this surgery. Information  
29 from SCM included patient demographics, preoperative comorbidities such as smoking,  
30 haemoglobin level, individual components of the Revised Risk Cardiac Index [18,19], such as a  
31 history of previous cerebrovascular accidents (CVA), ischemic heart disease (IHD), congestive  
32 cardiac failure (CCF), diabetes mellitus (DM) on insulin and elevated preoperative creatinine  
33 level >2mg/dL; ASA score [20]; details of the operation such as site, duration, type of  
34 anaesthesia and day of week the surgery was done [21]; perioperative blood transfusion and  
35 repeat surgeries during hospital stay were also obtained. The length of stay (LOS) was  
36 calculated from the date of admission, to the date of discharge from hospital to their home  
37 environment. 30-day readmission data after discharge was obtained from the clinical information  
38 system database, SCM. We filtered related readmission by the ICD-10 diagnosis, and further  
39 confirmed the cause of admission by looking up the patient's electronic medical records. We  
40 defined the window for preoperative haemoglobin levels to be taken at a maximum of 14 days  
41 and a minimum of one day before the surgery. We also defined perioperative blood transfusion  
42  
43  
44  
45  
46  
47  
48  
49  
50  
51  
52  
53  
54

5

1  
2  
3 to be within 2 weeks before up to 2 weeks after the date of surgery.  
4  
5

6  
7 In our institution, most patients are admitted on the day of surgery and very infrequently,  
8 1 day earlier for medical and/or social reasons. Routinely, all anti-platelets apart from Aspirin  
9 are stopped for the recommended duration before the surgery. The use of intraoperative  
10 tranexamic acid filtration to the knee joint and the placement of a drain into the joint after the  
11 surgery is not standardized. Use of cell salvage is rare. Postoperatively, all patients receive a  
12 standard hospital TKA protocol for postoperative care. This includes thromboembolism  
13 chemoprophylaxis with 40 mg once daily subcutaneous low molecular weight heparin (Clexane,  
14 Sanofi, Paris, France) on the first postoperative day, which is discontinued upon discharge.  
15 Patients also receive routine physiotherapy starting from the first postoperative day, even if it  
16 falls on the weekend. They are deemed fit for discharge when there is an agreement between  
17 the surgeon and physiotherapist that the patient is medically stable and that their functional  
18 ability is sufficient to allow discharge to their home environment. This includes being able to  
19 climb up a few steps, transfer with the aid of a walking frame and to bend their operated knee  
20 close to 90 degrees.  
21  
22

23  
24  
25 After excluding 51 patients with more than 3 missing variables, 3 patients who did not  
26 have pre-operative haemoglobin levels, and 22 patients who underwent revision surgery, we  
27 obtained 2600 patients in the final analysis (Figure 1). No sensitivity analysis accounting for the  
28 missing data was done due to the small number (2.0%).  
29  
30  
31  
32  
33  
34  
35

36 **Figure 1. Flowchart showing derivation of study cohort.**  
37  
38  
39  
40  
41  
42  
43  
44  
45  
46  
47  
48  
49  
50  
51  
52  
53  
54  
55  
56  
57  
58  
59  
60

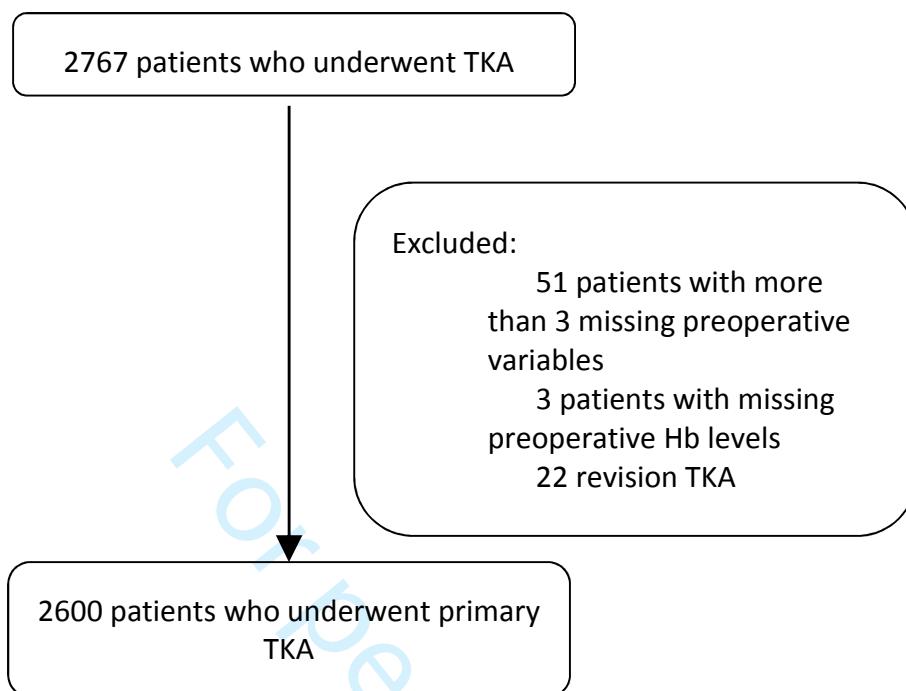

The primary outcome was prolonged LOS, defined as more than 6 days. This variable was selected as it represents >75th centile LOS of the whole sample. The use of 75th centile to define prolonged LOS is consistent with other studies [22]. The secondary outcome was readmission for any reason within 30 days after surgery.

### Statistical analysis

We used the World Health Organisation (WHO)'s gender-based definition of anaemia severity [23]. Thus, mild anaemia was defined as haemoglobin concentration of 11-12.9g/dL in males and 11-11.9g/dL in females; moderate anaemia was defined for both genders to be haemoglobin concentration between 8-10.9g/dL and severe anaemia defined as haemoglobin concentration <8.0g/dL. Among the 610 patients (23.5%) with anaemia, 434 patients (16.7%) had mild preoperative anaemia, 171 patients (6.6%) had moderate anaemia and 5 patients had severe anaemia (0.2%). Due to the small incidence of severe anaemia in the sample, we decided to group and analyse patients with moderate and severe anaemia together.

Patient demographics and clinical characteristics were compared between LOS >6 and ≤6 days (Table 1). For continuous variables, mean and standard deviation (SD) were presented and Mann-Whitney U test was used to test the mean differences between the 2 groups. For categorical variables, Chi-square test was used to compare the percentages between the 2 groups. We categorized continuous variable such as age according to their broad centile



groups, BMI according to the WHO definition of obesity, and operative duration according to  $\leq 100$  minutes or  $> 100$  minutes which corresponds to  $>75$ th centile of the data. 57 cases out

| Variable | LOS $\leq 6$ days<br>N=2053 | LOS $> 6$ days<br>N= 547 | P-value |
|----------|-----------------------------|--------------------------|---------|
|----------|-----------------------------|--------------------------|---------|

of the final 2600 patients with incomplete data were excluded from multivariate analysis. Multivariate logistic regression was performed to determine independent predictors for increased LOS and perioperative blood transfusion while adjusting for demographic, preoperative clinical risk factors and surgical factors. All clinically relevant risk factors were used in this multivariate logistic regression. Further subgroup analysis was done for separately patients who underwent unilateral versus bilateral surgery. Analyses were performed using IBM SPSS Statistics v20.

## Results

Table 1. Demographics of patients with normal Length of Stay (LOS) ( $\leq 6$  days) versus those with prolonged LOS ( $> 6$  days) after Total Knee Replacement (TKR)

| <b>Patient demographics</b>                   |                 |             |             |        |
|-----------------------------------------------|-----------------|-------------|-------------|--------|
| Age – mean (sd)                               |                 | 65.7 (8.1)  | 68.5 (8.5)  | <0.001 |
| Race – n (%)                                  | Chinese         | 1726 (84.1) | 462 (84.5)  | 0.01   |
|                                               | Malay           | 161 (7.8)   | 26 (4.8)    |        |
|                                               | Indian          | 113 (5.5)   | 35 (6.4)    |        |
|                                               | Others          | 53 (2.6)    | 24 (4.4)    |        |
| Body Mass Index – n (%)                       | < 25            | 586 (29.0)  | 165 (32.2)  | 0.25   |
|                                               | 25 – 29.9       | 864 (42.7)  | 211 (41.2)  |        |
|                                               | 30 – 34.9       | 434 (21.5)  | 95 (18.6)   |        |
|                                               | ≥ 35            | 138 (6.8)   | 41 (8.0)    |        |
| Gender – n (%)                                | Male            | 504 (24.5)  | 119 (21.8)  | 0.17   |
|                                               | Female          | 1549 (75.5) | 428 (78.2)  |        |
| <b>Details of Operation</b>                   |                 |             |             |        |
| Type of Surgery – n (%)                       | Unilateral      | 1933 (94.2) | 461 (84.3)  | <0.001 |
|                                               | Bilateral       | 120 (5.8)   | 86 (15.7)   |        |
| Type of Anaesthesia – n (%)                   | GA              | 711 (34.6)  | 236 (43.1)  | <0.001 |
|                                               | RA              | 1342 (65.4) | 311 (56.9)  |        |
| Duration of operation – minutes (sd)          |                 | 82.6 (25.2) | 91.6 (32.7) | <0.001 |
| Perioperative Blood Transfusion – n (%)       | None            | 1988 (96.8) | 461 (84.3)  | <0.001 |
|                                               | 1 unit          | 50 (2.4)    | 44 (8.0)    |        |
|                                               | 2,3 units       | 15 (0.7)    | 34 (6.2)    |        |
|                                               | ≥ 4 units       | 0           | 8 (1.5)     |        |
| Repeat Operation within Hospital Stay – n (%) | Yes             | 1 (0.0)     | 8 (1.5)     | <0.001 |
| Day of Week of Operation – n (%)              | Monday          | 323 (15.7)  | 109 (19.9)  | <0.001 |
|                                               | Tuesday         | 445 (21.7)  | 140 (25.6)  |        |
|                                               | Wednesday       | 349 (17.0)  | 94 (17.2)   |        |
|                                               | Thursday        | 513 (25.0)  | 80 (14.6)   |        |
|                                               | Friday          | 317 (15.4)  | 99 (18.1)   |        |
|                                               | Saturday        | 106 (5/2)   | 25 (4.6)    |        |
| <b>Patient comorbidities</b>                  |                 |             |             |        |
| Anaemia – n (%)                               | None            | 1633 (79.5) | 357 (65.3)  | <0.001 |
|                                               | Mild            | 313 (15.2)  | 121 (22.1)  |        |
|                                               | Moderate/Severe | 107 (5.2)   | 69 (12.6)   |        |
| DM on insulin – n (%)                         | Yes             | 32 (1.6)    | 12 (2.2)    | 0.35   |
| Creatinine > 2mg / dL – n (%)                 | Yes             | 10 (0.5)    | 10 (1.8)    | 0.004  |
| Previous CVA – n (%)                          | Yes             | 26 (1.3)    | 21 (3.8)    | <0.001 |
| IHD – n (%)                                   | Yes             | 92 (4.5)    | 40 (7.3)    | 0.01   |
| CCF – n (%)                                   | Yes             | 14 (0.7)    | 9 (1.6)     | 0.04   |
| Smoking – n (%)                               | Yes             | 194 (9.4)   | 53 (9.7)    | 0.87   |
| ASA                                           | 1               | 148 (7.2)   | 35 (6.4)    | <0.001 |
|                                               | 2               | 1803 (87.8) | 453 (82.8)  |        |

|   |           |           |  |
|---|-----------|-----------|--|
| 3 | 102 (5.0) | 59 (10.8) |  |
|---|-----------|-----------|--|

Table 2. Variables that predict increased Length of Stay (LOS) in Hospital after Total Knee Replacement, based on univariate and multivariate analysis.

| Variable                                |            | OR ( 95% CI)          | P-value | aOR (95% CI)*         | P-value |
|-----------------------------------------|------------|-----------------------|---------|-----------------------|---------|
| <b>Patient Demographics</b>             |            |                       |         |                       |         |
| Age (years)                             | <60        | REF                   |         | REF                   |         |
|                                         | 60-64      | 1.03 (0.74 – 1.43)    | 0.85    | 1.18 (0.82 – 1.68)    | 0.37    |
|                                         | 65-69      | 1.59 (1.17 – 2.15)    | 0.003   | 1.68 (1.19 – 2.36)    | 0.003   |
|                                         | >70        | 1.90 (1.45 – 2.51)    | <0.001  | 2.04 (1.48 – 2.82)    | <0.001  |
| Race                                    | Malay      | REF                   |         | REF                   |         |
|                                         | Indian     | 1.92 (1.09 – 3.36)    | 0.02    | 2.61 (1.39 – 4.92)    | 0.003   |
|                                         | Others     | 2.80 (1.49 – 5.30)    | 0.001   | 2.92 (1.38 – 6.19)    | 0.005   |
|                                         | Chinese    | 1.66 (1.08 – 2.54)    | 0.02    | 2.07 (1.23 – 3.49)    | 0.006   |
| Body Mass Index                         | <25        | REF                   |         | REF                   |         |
|                                         | 25 – 29.9  | 0.87 (0.69 – 1.09)    | 0.22    | 0.98 (0.76 – 1.25)    | 0.84    |
|                                         | 30 – 34.9  | 0.78 (0.59 – 1.03)    | 0.08    | 0.98 (0.72 – 1.33)    | 0.88    |
|                                         | ≥ 35       | 1.06 (0.72 – 1.56)    | 0.79    | 1.47 (0.93 – 2.32)    | 0.10    |
| Gender                                  | Male       | REF                   |         | REF                   |         |
|                                         | Female     | 1.17 (0.93 – 1.47)    | 0.17    | 1.89 (0.89 – 1.58)    | 0.24    |
| <b>Details of Operation</b>             |            |                       |         |                       |         |
| Type of Surgery                         | Unilateral | REF                   |         | REF                   |         |
|                                         | Bilateral  | 3.01 (2.24 – 4.04)    | <0.001  | 2.76 (1.88 – 4.05)    | <0.001  |
| Type of Anaesthesia                     | GA         | REF                   |         | REF                   |         |
|                                         | RA         | 0.70 (0.58 – 0.85)    | <0.001  | 0.74 (0.60 – 0.92)    | 0.007   |
| Duration of operation (minutes)         | ≤ 100      | REF                   |         | REF                   |         |
|                                         | > 100      | 1.73 (1.39 – 2.15)    | <0.001  | 1.29 (0.97 – 1.70)    | 0.08    |
| Perioperative Blood Transfusion (units) | None       | REF                   |         | REF                   |         |
|                                         | 1          | 3.80 (2.50 – 5.76)    | <0.001  | 1.98 (1.22 – 3.22)    | 0.006   |
|                                         | ≥ 2        | 12.08 (6.64 – 21.96)  | <0.001  | 5.65 (2.92 – 10.90)   | <0.001  |
| Repeat Operation within Hospital Stay   |            | 30.46 (3.80 – 244.04) | 0.001   | 16.29 (1.57 – 169.12) | 0.02    |
| Day of Week of Operation                | Monday     | 2.16 (1.57 – 2.98)    | <0.001  | 2.37 (1.66 – 3.36)    | <0.001  |
|                                         | Tuesday    | 2.02 (1.49 – 2.73)    | <0.001  | 2.41 (1.72 – 3.37)    | <0.001  |
|                                         | Wednesday  | 1.73 (1.25 – 2.40)    | 0.001   | 1.99 (1.39 – 2.84)    | <0.001  |
|                                         | Thursday   | REF                   |         | REF                   |         |
|                                         | Friday     | 2.00 (1.45 – 2.78)    | <0.001  | 1.93 (1.34 – 2.77)    | <0.001  |
|                                         | Saturday   | 1.51 (0.92 – 2.48)    | 0.10    | 1.70 (0.99 – 2.90)    | 0.05    |
| <b>Patient comorbidities</b>            |            |                       |         |                       |         |
| Anaemia                                 | None       | REF                   |         | REF                   |         |

|                     |                 |                    |        |                    |        |
|---------------------|-----------------|--------------------|--------|--------------------|--------|
|                     | Mild            | 1.77 (1.39 – 2.25) | <0.001 | 1.59 (1.22 – 2.08) | 0.001  |
|                     | Moderate/Severe | 2.95 (2.13 – 4.08) | <0.001 | 2.29 (1.57 – 3.34) | <0.001 |
| DM on insulin       |                 | 1.42 (0.73 – 2.77) | 0.31   | 1.12 (0.51 – 2.45) | 0.78   |
| Creatinine > 2mg/dL |                 | 3.80 (1.58 – 9.19) | 0.003  | 2.02 (0.70 – 5.82) | 0.20   |
| Previous CVA        |                 | 3.11 (1.74 – 5.58) | <0.001 | 2.84 (1.49 – 5.43) | 0.002  |
| IHD                 |                 | 1.68 (1.15 – 2.47) | 0.008  | 1.46 (0.94 – 2.27) | 0.09   |
| CCF                 |                 | 2.44 (1.05 – 5.66) | 0.04   | 1.52 (0.58 – 3.93) | 0.39   |
| Smoking             |                 | 1.03 (0.75 – 1.42) | 0.87   | 1.23 (0.83 – 1.81) | 0.30   |
| ASA Score           | 1               | REF                |        | REF                |        |
|                     | 2               | 1.06 (0.73 – 1.56) | 0.76   | 0.87 (0.57 – 1.31) | 0.49   |
|                     | 3               | 2.45 (1.50 – 3.99) | <0.001 | 1.30 (0.75 – 2.26) | 0.35   |

Table 3. Factors associated with Perioperative Blood Transfusion after Primary TKR

| Variable                              |                 | aOR (95% CI)*         | P-value |
|---------------------------------------|-----------------|-----------------------|---------|
| Type of Surgery                       | Unilateral      | REF                   |         |
|                                       | Bilateral       | 3.14 (1.73 – 5.69)    | <0.001  |
| Type of Anaesthesia                   | GA              | REF                   |         |
|                                       | RA              | 0.62 (0.42 – .91)     | 0.01    |
| Duration of operation (minutes)       | ≤ 100           | REF                   |         |
|                                       | > 100           | 1.58 (0.97 – 2.56)    | 0.07    |
| Repeat Operation within Hospital Stay |                 | 26.42 (4.61 – 151.56) | <0.001  |
| Anaemia                               | None            | REF                   |         |
|                                       | Mild            | 4.00 (2.59 – 6.16)    | <0.001  |
|                                       | Moderate/Severe | 8.15 (4.95 – 13.43)   | <0.001  |
| ASA Score                             | 1               | REF                   |         |
|                                       | 2               | 1.85 (0.71 – 4.80)    | 0.21    |
|                                       | 3               | 3.31 (1.09 – 10.07)   | 0.04    |
| CCF                                   |                 | 3.80 (1.21 – 12.01)   | 0.02    |

\* adjusted for all the variables listed in Table 1

### Demographics

Of the 2600 patients who underwent primary TKA during the study period, 23.5% were anaemic. In table 1, the mean age was higher in patients with prolonged LOS (68.5 years) compared to patients with normal LOS (65.7 years),  $p < 0.001$ . There was no significant difference in BMI or

1  
2  
3 gender distribution between the two groups. However, those with prolonged LOS tended to  
4 have a higher ASA score ( $p<0.001$ ), have more incidence of anaemia ( $p<0.001$ ), have previous  
5 CVA ( $p<0.001$ ), have repeat operation within hospital stay ( $p<0.001$ ), underwent bilateral  
6 surgery compared to unilateral surgery ( $p<0.001$ ), and received general anaesthesia compared  
7 to regional anaesthesia ( $p<0.001$ ).  
8  
9  
10

### 11 Length of stay (LOS)

12 The mean LOS for all TKA patients, including both unilateral and bilateral cases, was  $5.5 \pm 4.8$   
13 days, with a median of 4 days and 75<sup>th</sup> centile of 6 days. This result is similar to previous  
14 published LOS rates of primary unilateral TKA in our institution[24].  
15  
16  
17  
18

19 547 patients (21.0%) had LOS more than six days (i.e prolonged LOS). Based on the  
20 multivariate analysis presented in table 2, the variables associated with independent elevated  
21 risk of prolonged LOS include older age > 70years (aOR 2.04,  $p<0.001$ ), bilateral TKA (aOR  
22 2.76,  $p <0.001$ ), repeat surgery within LOS (aOR 16.20,  $p=0.02$ ), having mild anaemia (aOR  
23 1.59,  $p=0.001$ ) or moderate/severe anaemia (aOR 2.29,  $p<0.001$ ), and previous  
24 cerebrovascular accidents (CVA) (aOR 2.84,  $p=0.002$ ). Perioperative blood transfusion of 1 unit  
25 independently increased risk of prolonged LOS by 1.98 ( $p=0.006$ ), while transfusion of 2 or  
26 more units independently increased risk by 5.65 ( $p<0.001$ ). Variables that reduced LOS include  
27 having regional anaesthesia (aOR 0.74,  $p=0.007$ ), having surgery on Thursday and being of  
28 Malay race. BMI, gender, presence of DM on insulin, previous diagnosis of ischemic heart  
29 disease, previous history of congestive heart failure or smoking, and elevated ASA scores were  
30 not associated with higher risks of prolonged LOS.  
31  
32  
33  
34  
35  
36  
37  
38  
39

40 We did further subgroup analysis to establish whether the effect of anaemia on LOS is  
41 consistent in across both types of primary TKR - unilateral and bilateral. For patients who  
42 underwent unilateral TKR only (2394 cases), mild anaemia had an independent aOR of 1.71  
43 ( $p<0.001$ ) and moderate/severe anaemia had an independent aOR of 2.29 ( $p<0.001$ ) for  
44 prolonged LOS. For patients who underwent bilateral TKR (206 cases), anaemia was not  
45 associated with a significant impact on LOS. We postulate that the lack of significance is due to  
46 the small number of cases of patients who had anaemia who underwent bilateral TKR, of which  
47 31 had mild anaemia and only 12 had moderate/severe anaemia.  
48  
49  
50  
51  
52  
53  
54  
55  
56  
57  
58  
59  
60

### Perioperative blood transfusion

Factors that increased risk of perioperative blood transfusion (Table 3) included bilateral surgery (aOR 3.14,  $p < 0.001$ ), repeat operation during hospital stay (aOR 26.42,  $p < 0.001$ ), presence of mild anaemia (aOR 4.00,  $p < 0.001$ ) and moderate/severe anaemia (aOR 8.00,  $p < 0.001$ ), ASA score of 3 (aOR 3.31,  $p = 0.04$ ), and history of CCF (aOR 3.80,  $p = 0.02$ ). Regional anaesthesia was found to reduce risk of perioperative blood transfusion (aOR 0.62,  $p = 0.01$ ).

### Hospital readmission within 30 days

We had 45 cases of related readmission within 30 days of discharge out of 2600 cases (1.7%). 14 were due to infection, 12 due to pain, swelling and/or stiffness after surgery, 4 due to discharge from the wound that is non-infected, 5 due to non-infected wound discharge, 4 due to DVT in the operative leg, 3 due to periprosthetic fractures, 3 due to hematoma/bleeding from the wound, 2 due to wound erythema, 1 due to wound dehiscence and 1 from contact dermatitis of the wound. Due to the low rates of readmission, no further statistical analysis was done.

### **Discussion**

In this retrospective cohort study of 2600 consecutive patients who underwent elective primary TKA in our center, the prevalence of preoperative anaemia, as defined by the WHO gender-based classification, was found to be at 23.5%. Patients with mild preoperative anaemia had an adjusted Odd Ratio of prolonged LOS (> 6 days) of 1.57, while patients with moderate/severe anemia had an adjusted Odds Ratio of 2.29. Our findings are consistent with previous studies which explored the relationship between preoperative anaemia and LOS in elective primary knee arthroplasties. For example, Jans et al. found preoperative anaemia to be an independent predictor of prolonged LOS among patients undergoing “fast-track” knee arthroplasty [11]. This is similar with another observational study, conducted in the “traditional pathway” environment for elective primary knee arthroplasty [25]. As these studies were done in the western world health systems and a wide disparity in postoperative hospital stays after TKA has been documented due to the [26–29] variations in practice and rehabilitation protocols between countries, our study provided a perspective from a South East Asian healthcare system. In countries with advanced healthcare systems and an ageing population, the exponentially increasing number of TKAs performed yearly [3] importunes that more effort is needed to identify modifiable risk factors for delayed hospital discharges. This is an important

1  
2  
3 health care cost containment strategy, especially as TKAs are elective procedures that can be  
4 postponed to allow optimization of risk factors for suboptimal outcomes.  
5

6 Recent publications have highlighted the need for improved patient blood management  
7 in anaemic patients and our study strengthens this argument for elective arthroplasty cases [30–  
8 32]. With the potential cost and hospital bed savings, it may be justified to delay this elective  
9 surgery to treat any underlying reversible causes of anaemia, such as iron-deficiency anaemia.  
10 In a recent RCT by Froessler, preoperative intravenous iron treatment of iron deficiency  
11 anaemia among patients who underwent major abdominal surgery resulted in reduction of  
12 median LOS by three days [33].  
13

14 Other studies have found preoperative anaemia to be a strong predictor for perioperative  
15 allogeneic blood transfusion in knee surgeries[34,35], which is associated with poorer outcomes  
16 and prolonged LOS [11,36]. In our study, we found that even mild anemia was an independent  
17 risk factor for perioperative blood transfusion (aOR 4.00;  $p < 0.001$ ). Furthermore, there is an  
18 incremental effect as patients with moderate/severe anemia are at an even higher risk (aOR  
19 8.00;  $p < 0.001$ ) for perioperative blood transfusion. This has a direct impact on LOS as the  
20 presence of anaemia (both mild and moderate/severe), and perioperative transfusion of even 1  
21 unit of blood independently increases the risk of prolonged LOS.  
22  
23  
24  
25  
26  
27  
28  
29

30 One of the aims of our study was to identify the risk factors for 30-day hospital  
31 readmission in our study population. However, we were unable to do so due to the small  
32 incidence of 45 readmissions out of 2600 cases, which precludes any meaningful analysis. Our  
33 30-day related readmission rates are similar to previous published rate in our institution, which  
34 is between 1.7-2.9% for primary unilateral TKR.[24]. This is lower than the 30-day all-cause  
35 readmission rates in literature of 4.0 -5.5% [37–39], because it only looks at readmission that is  
36 related to complications attributable to the surgery. Nevertheless, our readmission rates are  
37 similar to Schairer et al's 30-day surgical readmission rate of 2.4%, of which cellulitis and  
38 surgical site infection are the most common causes. In our study, surgical site infection was also  
39 the most common cause of readmission (31.1%).  
40  
41  
42  
43  
44  
45  
46

#### 47 Strengths of study

48  
49 One of the strengths of our study was that it is amongst the first few to control for the day  
50 of the week the surgery was done, which has recently been shown to affect LOS in TKA and  
51 total hip arthroplasty [21]. We found that having surgery on Thursday is significantly associated  
52 with the lowest odds of prolonged LOS. We postulate that this is because patients would have  
53  
54  
55

1  
2  
3 received standard physiotherapy for at least two days, on Friday and Saturday, and may be  
4 inclined to go home on Sunday where there is more familial support at home.

6 Another strength of our study is that we included both subjective measures of clinical  
7 risk estimates such as the ASA score [27,43], as well as the components of the RCRI which  
8 comprise of diagnosis of specific conditions. This allowed us to find that out of the 5 clinical  
9 conditions within the RCRI score, only a history of previous CVA was significantly associated  
10 with increased LOS (aOR 2.84, p=0.002). Furthermore, a history of CCF was found to be  
11 associated with increased risk of perioperative blood transfusion (aOR 3.80, p=0.02).

16 Finally, we focused our study on patients who underwent primary total knee arthroplasty  
17 rather than combining hip and knee arthroplasty together, which is more commonly done in  
18 literature, as we wanted a more homogenous study population. We excluded revision TKA as it  
19 is known in literature to be associated with increased need for blood transfusion.[40,41]  
20  
21  
22  
23  
24

#### 25 Limitations of study

27 Our study recruitment occurred over 1.5 years. Our recruitment period is similar to  
28 another study published on this topic, which recruited over a 2 year period[11]. We also had a  
29 modest study cohort of 2600 patients which is comparable to other studies [11,37]. While our  
30 study was performed retrospectively, it had minimal missing data (2.0%). This may be due to  
31 the fact that our clinical data, such as the preoperative variables, were collected electronically  
32 in a mandatory, prospective manner during routine preoperative anaesthesia assessment. Due  
33 to the observational nature of the study, a causal relationship between preoperative anaemia  
34 and adverse outcomes is difficult to establish. In addition, while our selection of the 75th centile  
35 for defining prolonged LOS can be viewed as an arbitrary cut-off in the absence of a universal  
36 definition of prolonged LOS, the use of 75th centile has been done in literature before for a  
37 similar study [22]. We do not have data on whether drains were placed by the surgeons during  
38 the surgery, however, a recent study done in the same institution showed that while drains were  
39 associated with a larger drop in Hb level and greater total blood loss, it did not significantly  
40 impact blood transfusion rate, LOS or 30-day readmission rates[24].  
41  
42  
43  
44  
45  
46  
47  
48  
49

#### 50 Conclusion

52 In conclusion, we found the prevalence of preoperative anaemia to be 23.5% among  
53 patients who underwent primary total knee arthroplasty in Singapore. It was an independent risk  
54



1  
2  
3 factor for prolonged length of hospital stay after the surgery and perioperative blood transfusion.  
4 We suggest measures to correct anaemia prior to surgery should be considered.  
5  
6  
7

### 8 **Acknowledgements**

9 We would like to thank Ms Serene Ong, Academic Medicine Research Institute, Duke-NUS  
10 Medical School, for her help in manuscript preparation. We also like to thank Ms Sudha  
11 Harikrishnan, from the Department of Anaesthesiology, for her invaluable help in data  
12 extraction. This research received no specific grant from any funding agency in the public,  
13 commercial or not-for-profit sectors.  
14

15  
16  
17 Lastly, we would also like to thank Dr Chan Yiong Huak, Head, Biostatistics Unit, Yong Loo Lin  
18 School of Medicine, National University of Singapore, National University Health System,  
19 Singapore for his invaluable help in data analysis and interpretation.  
20  
21  
22

### 23 **Contributorship statement**

24  
25 Abdullah HR - Contributed to the study conception and design, data acquisition, analysis and  
26 interpretation, drafting and final approval of the manuscript.  
27

28 Sim YE – Contributed to data analysis and interpretation, drafting, revision and final approval of  
29 the manuscript  
30

31 Y Hao – Contributed to data analysis and interpretation, drafting of the manuscript and final  
32 approval  
33

34 Lin GY – Contributed to data acquisition, analysis and interpretation, drafting of the manuscript  
35 and final approval  
36

37 Liew GHC - Contributed to the study conception and design, data analysis, revision of the  
38 manuscript and final approval  
39

40 EL Lamoureux – Contributed to data analysis and critical appraisal, revision and final approval  
41 of the manuscript.  
42

43 MH Tan – Contributed to the study conception and design, drafting of manuscript and final  
44 approval.  
45  
46  
47  
48  
49

### 50 **Competing interests**

51 No conflicts of interest to declare.  
52  
53  
54  
55  
56  
57  
58  
59  
60

1  
2  
3  
4  
5  
6  
7  
8  
9  
10  
11  
12  
13  
14  
15  
16  
17  
18  
19  
20  
21  
22  
23  
24  
25  
26  
27  
28  
29  
30  
31  
32  
33  
34  
35  
36  
37  
38  
39  
40  
41  
42  
43  
44  
45  
46  
47  
48  
49  
50  
51  
52  
53  
54  
55  
56  
57  
58  
59  
60

**Funding**

This research was funded by the hospital department funds.

**Data Sharing**

Full dataset can be downloaded from <http://dx.doi.org/10.5061/dryad.73250/1>

For peer review only

## References

1. Baron DM, Hochrieser H, Posch M, Metnitz B, Rhodes A, Moreno RP, et al. Preoperative anaemia is associated with poor clinical outcome in non-cardiac surgery patients. *Br J Anaesth*. 2014;113: 416–423.
2. HCUPnet: A tool for identifying, tracking, and analyzing national hospital statistics [Internet]. [cited 15 Aug 2016]. Available: <http://hcupnet.ahrq.gov/>
3. Maradit Kremers H, Larson DR, Crowson CS, Kremers WK, Washington RE, Steiner CA, et al. Prevalence of Total Hip and Knee Replacement in the United States. *J Bone Joint Surg Am*. 2015;97: 1386–1397.
4. den Hertog A, Gliesche K, Timm J, Mühlbauer B, Zebrowski S. Pathway-controlled fast-track rehabilitation after total knee arthroplasty: a randomized prospective clinical study evaluating the recovery pattern, drug consumption, and length of stay. *Arch Orthop Trauma Surg*. 2012;132: 1153–1163.
5. Husted H, Jensen CM, Solgaard S, Kehlet H. Reduced length of stay following hip and knee arthroplasty in Denmark 2000–2009: from research to implementation. *Arch Orthop Trauma Surg*. Springer-Verlag; 2011;132: 101–104.
6. Healy WL, Rana AJ, Iorio R. Hospital economics of primary total knee arthroplasty at a teaching hospital. *Clin Orthop Relat Res*. 2011;469: 87–94.
7. Lovald ST, Ong KL, Malkani AL, Lau EC, Schmier JK, Kurtz SM, et al. Complications, mortality, and costs for outpatient and short-stay total knee arthroplasty patients in comparison to standard-stay patients. *J Arthroplasty*. 2014;29: 510–515.
8. Kim S, Losina E, Solomon DH, Wright J, Katz JN. Effectiveness of clinical pathways for total knee and total hip arthroplasty Literature review. *J Arthroplasty*. 2003/1;18: 69–74.
9. Ayalon O, Liu S, Flics S, Cahill J, Juliano K, Cornell CN. A multimodal clinical pathway can reduce length of stay after total knee arthroplasty. *HSS J*. 2011;7: 9–15.
10. Liதாகி E, Bergeron SG, Zukor DJ, Huk OL, Epure LM, Antoniou J. Perioperative Complications and Length of Stay After Revision Total Hip and Knee Arthroplasties: An Analysis of the NSQIP Database. *J Arthroplasty*. 2015;30: 1868–1871.
11. Jans Ø, Jørgensen C, Kehlet H, Johansson PI, Lundbeck Foundation Centre for Fast-track Hip and Knee Replacement Collaborative Group. Role of preoperative anemia for risk of transfusion and postoperative morbidity in fast-track hip and knee arthroplasty. *Transfusion*. 2014;54: 717–726.
12. Bs JV, Gomez MM, Restrepo C, Maltenfort MG, Fracs JPMD. Preoperative Anemia Increases Postoperative Complications and Mortality Following Total Joint Arthroplasty. *J Arthroplasty*. Elsevier Inc.; 30: 846–848.
13. Chamieh JS, Tamim HM, Masrouha KZ, Saghie SS, Al-Taki MM. The Association of

- 1  
2  
3 Anemia and Its Severity with Cardiac Outcomes and Mortality After Total Knee Arthroplasty  
4 in Noncardiac Patients. *J Arthroplasty*. 2016;31: 766–770.  
5
- 6 14. Jans Ø, Jørgensen C, Kehlet H, Johansson PI. Role of preoperative anemia for risk of  
7 transfusion and postoperative morbidity in fast-track hip and knee arthroplasty.  
8 *Transfusion*. Wiley Online Library; 2014; Available:  
9 <http://onlinelibrary.wiley.com/doi/10.1111/trf.12332/full>  
10
- 11 15. Pitter FT, Jørgensen CC, Lindberg-Larsen M, Kehlet H, Lundbeck Foundation Center for  
12 Fast-track Hip and Knee Replacement Collaborative Group. Postoperative Morbidity and  
13 Discharge Destinations After Fast-Track Hip and Knee Arthroplasty in Patients Older Than  
14 85 Years. *Anesth Analg*. 2016;122: 1807–1815.  
15
- 16 16. Greenky M, Gandhi K, Pulido L, Restrepo C, Parvizi J. Preoperative anemia in total joint  
17 arthroplasty: is it associated with periprosthetic joint infection? *Clin Orthop Relat Res*.  
18 2012;470: 2695–2701.  
19
- 20 17. Husted H, Holm G, Jacobsen S. Predictors of length of stay and patient satisfaction after  
21 hip and knee replacement surgery: fast-track experience in 712 patients. *Acta Orthop*.  
22 2008;79: 168–173.  
23
- 24 18. Fleisher LA, Fleischmann KE, Auerbach AD, Barnason SA, Beckman JA, Bozkurt B, et al.  
25 2014 ACC/AHA guideline on perioperative cardiovascular evaluation and management of  
26 patients undergoing noncardiac surgery: executive summary: a report of the American  
27 College of Cardiology/American Heart Association Task Force on Practice Guidelines.  
28 *Circulation*. 2014;130: 2215–2245.  
29
- 30 19. Lee TH, Marcantonio ER, Mangione CM, Thomas EJ, Polanczyk CA, Cook EF, et al.  
31 Derivation and prospective validation of a simple index for prediction of cardiac risk of major  
32 noncardiac surgery. *Circulation*. 1999;100: 1043–1049.  
33
- 34 20. American Society of Anesthesiologists - ASA Physical Status Classification System  
35 [Internet]. [cited 11 Jul 2016]. Available: [https://www.asahq.org/resources/clinical-](https://www.asahq.org/resources/clinical-information/asa-physical-status-classification-system)  
36 [information/asa-physical-status-classification-system](https://www.asahq.org/resources/clinical-information/asa-physical-status-classification-system)  
37  
38
- 39 21. Newman JM, Szubski CR, Barsoum WK, Higuera CA, Molloy RM, Murray TG. Day of  
40 Surgery Affects Length of Stay and Charges in Primary Total Hip and Knee Arthroplasty. *J*  
41 *Arthroplasty*. 2016; doi:10.1016/j.arth.2016.06.032  
42
- 43 22. Almashrafi A, Alsabti H, Mukaddirov M, Balan B, Aylin P. Factors associated with prolonged  
44 length of stay following cardiac surgery in a major referral hospital in Oman: a retrospective  
45 observational study. *BMJ Open*. 2016;6: e010764.  
46
- 47 23. Health Organization W. Nutritional anaemias: report of a WHO scientific group [meeting  
48 held in Geneva from 13 to 17 March 1967]. *apps.who.int*; 1968; Available:  
49 <http://apps.who.int/iris/handle/10665/40707>  
50
- 51 24. Chen JY, Lee WC, Chan HY, Chang PCC, Lo NN, Yeo SJ. Drain use in total knee  
52 arthroplasty is neither associated with a greater transfusion rate nor a longer hospital stay.  
53 *Int Orthop*. 2016;40: 2505–2509.  
54  
55  
56  
57  
58  
59  
60

- 1
  - 2
  - 3
  - 4
  - 5
  - 6
  - 7
  - 8
  - 9
  - 10
  - 11
  - 12
  - 13
  - 14
  - 15
  - 16
  - 17
  - 18
  - 19
  - 20
  - 21
  - 22
  - 23
  - 24
  - 25
  - 26
  - 27
  - 28
  - 29
  - 30
  - 31
  - 32
  - 33
  - 34
  - 35
  - 36
  - 37
  - 38
  - 39
  - 40
  - 41
  - 42
  - 43
  - 44
  - 45
  - 46
  - 47
  - 48
  - 49
  - 50
  - 51
  - 52
  - 53
  - 54
  - 55
  - 56
  - 57
  - 58
  - 59
  - 60
25. Smith IDM, Elton R, Ballantyne JA, Brenkel IJ. Pre-operative predictors of the length of hospital stay in total knee replacement. *J Bone Joint Surg Br.* 2008;90: 1435–1440.
26. Monsef JB, Della Valle AG, Mayman DJ, Marx RG, Ranawat AS, Boettner F. The impact of blood management on length of stay after primary total knee arthroplasty. *Open Orthop J.* 2014;8: 108–113.
27. Vorhies JS, Wang Y, Herndon JH, Maloney WJ, Huddleston JI. Decreased length of stay after TKA is not associated with increased readmission rates in a national Medicare sample. *Clin Orthop Relat Res.* 2012;470: 166–171.
28. Krämer S, Wenk M, Fischer G, Möllmann M, Pöpping DM. Continuous spinal anesthesia versus continuous femoral nerve block for elective total knee replacement. *Minerva Anesthesiol.* 2011;77: 394–400.
29. Dauty M, Smitt X, Menu P, Dubois C. Which factors affect the duration of inpatient rehabilitation after total knee arthroplasty in the absence of complications? *Ann Phys Rehabil Med.* 2009;52: 234–245.
30. Muñoz M, Gómez-Ramírez S, Kozek-Langenecker S, Shander A, Richards T, Pavía J, et al. “Fit to fly”: overcoming barriers to preoperative haemoglobin optimization in surgical patients. *Br J Anaesth.* 2015;115: 15–24.
31. Shander A, Van Aken H, Colomina MJ, Gombotz H, Hofmann A, Krauspe R, et al. Patient blood management in Europe. *Br J Anaesth.* 2012;109: 55–68.
32. Shaz BH, Hillyer CD, Waters JH. Patient Blood Management: Key for Accountable Care Organizations. *JAMA Surg.* American Medical Association; 2013;148: 491–492.
33. Froessler B, Palm P, Weber I, Hodyl NA, Singh R, Murphy EM. The Important Role for Intravenous Iron in Perioperative Patient Blood Management in Major Abdominal Surgery: A Randomized Controlled Trial. *Ann Surg.* 2016;264: 41–46.
34. Salido JA, Marín LA, Gómez LA, Zorrilla P, Martínez C. Preoperative hemoglobin levels and the need for transfusion after prosthetic hip and knee surgery: analysis of predictive factors. *J Bone Joint Surg Am.* 2002;84-A: 216–220.
35. Carling MS, Jeppsson A, Eriksson BI, Brisby H. Transfusions and blood loss in total hip and knee arthroplasty: a prospective observational study. *J Orthop Surg Res.* 2015;10: 48.
36. Whitlock EL, Kim H, Auerbach AD. Harms associated with single unit perioperative transfusion: retrospective population based analysis. *BMJ.* 2015;350: h3037.
37. Schairer WW, Vail TP, Bozic KJ. What are the rates and causes of hospital readmission after total knee arthroplasty? *Clin Orthop Relat Res.* 2014;472: 181–187.
38. Brown NM, Sheth NP, Davis K, Berend ME, Lombardi AV, Berend KR, et al. Total knee arthroplasty has higher postoperative morbidity than unicompartmental knee arthroplasty: a multicenter analysis. *J Arthroplasty.* 2012;27: 86–90.
39. Huddleston JI, Maloney WJ, Wang Y, Verzier N, Hunt DR, Herndon JH. Adverse events

- 1  
2  
3 after total knee arthroplasty: a national Medicare study. *J Arthroplasty*. 2009;24: 95–100.  
4  
5 40. Callaghan JJ, Spitzer AI. Blood management and patient specific transfusion options in  
6 total joint replacement surgery. *Iowa Orthop J*. 2000;20: 36–45.  
7  
8 41. Robinson S, McGonigle O, Volin S, Sun Y-C, Moore M, Cassidy C, et al. Comprehensive  
9 Look at Blood Transfusion Utilization in Total Joint Arthroplasty at a Single Academic  
10 Medical Center under a Single Surgeon. *J Blood Transfus*. 2013;2013: 983250.  
11  
12  
13  
14  
15  
16  
17  
18  
19  
20  
21  
22  
23  
24  
25  
26  
27  
28  
29  
30  
31  
32  
33  
34  
35  
36  
37  
38  
39  
40  
41  
42  
43  
44  
45  
46  
47  
48  
49  
50  
51  
52  
53  
54  
55  
56  
57  
58  
59  
60

For peer review only

STROBE Statement—Checklist of items that should be included in reports of *cohort studies*

|                              | Page where<br>Item can be<br>found | Recommendation                                                                                                                                                                                    |
|------------------------------|------------------------------------|---------------------------------------------------------------------------------------------------------------------------------------------------------------------------------------------------|
| <b>Title</b>                 | 1                                  | (a) Indicate the study's design with a commonly used term in the title or the abstract                                                                                                            |
| <b>Abstract</b>              | 3                                  | (b) Provide in the abstract an informative and balanced summary of what was done and what was found                                                                                               |
| <b>Introduction</b>          |                                    |                                                                                                                                                                                                   |
| Background/rationale         | 4                                  | Explain the scientific background and rationale for the investigation being reported                                                                                                              |
| Objectives                   | 5                                  | State specific objectives, including any prespecified hypotheses                                                                                                                                  |
| <b>Methods</b>               |                                    |                                                                                                                                                                                                   |
| Study design                 | 5-6                                | Present key elements of study design early in the paper                                                                                                                                           |
| Setting                      | 5-6                                | Describe the setting, locations, and relevant dates, including periods of recruitment, exposure, follow-up, and data collection                                                                   |
| Participants                 | 5-6                                | (a) Give the eligibility criteria, and the sources and methods of selection of participants. Describe methods of follow-up                                                                        |
|                              | NA                                 | (b) For matched studies, give matching criteria and number of exposed and unexposed                                                                                                               |
| Variables                    | 5-7                                | Clearly define all outcomes, exposures, predictors, potential confounders, and effect modifiers. Give diagnostic criteria, if applicable                                                          |
| Data sources/<br>measurement | 5-6                                | For each variable of interest, give sources of data and details of methods of assessment (measurement). Describe comparability of assessment methods if there is more than one group              |
| Bias                         | NA                                 | Describe any efforts to address potential sources of bias                                                                                                                                         |
| Study size                   | NA                                 | Explain how the study size was arrived at                                                                                                                                                         |
| Quantitative variables       | 7                                  | Explain how quantitative variables were handled in the analyses. If applicable, describe which groupings were chosen and why                                                                      |
| Statistical methods          | 7                                  | (a) Describe all statistical methods, including those used to control for confounding                                                                                                             |
|                              | 7                                  | (b) Describe any methods used to examine subgroups and interactions                                                                                                                               |
|                              | 6                                  | (c) Explain how missing data were addressed                                                                                                                                                       |
|                              | NA                                 | (d) If applicable, explain how loss to follow-up was addressed                                                                                                                                    |
|                              | 6                                  | (e) Describe any sensitivity analyses                                                                                                                                                             |
| <b>Results</b>               |                                    |                                                                                                                                                                                                   |
| Participants                 | 6                                  | (a) Report numbers of individuals at each stage of study—eg numbers potentially eligible, examined for eligibility, confirmed eligible, included in the study, completing follow-up, and analysed |
|                              | 6                                  | (b) Give reasons for non-participation at each stage                                                                                                                                              |
|                              | 6                                  | (c) Consider use of a flow diagram                                                                                                                                                                |
| Descriptive data             | 6-7                                | (a) Give characteristics of study participants (eg demographic, clinical, social) and information on exposures and potential confounders                                                          |
|                              | 7                                  | (b) Indicate number of participants with missing data for each variable of interest                                                                                                               |
|                              | NA                                 | (c) Summarise follow-up time (eg, average and total amount)                                                                                                                                       |
| Outcome data                 | 7-10                               | Report numbers of outcome events or summary measures over time                                                                                                                                    |
| Main results                 | 9-10                               | (a) Give unadjusted estimates and, if applicable, confounder-adjusted                                                                                                                             |

|                          |       |                                                                                                                                                                            |
|--------------------------|-------|----------------------------------------------------------------------------------------------------------------------------------------------------------------------------|
|                          |       | estimates and their precision (eg, 95% confidence interval). Make clear which confounders were adjusted for and why they were included                                     |
|                          | NA    | (b) Report category boundaries when continuous variables were categorized                                                                                                  |
|                          | NA    | (c) If relevant, consider translating estimates of relative risk into absolute risk for a meaningful time period                                                           |
| Other analyses           | 11    | Report other analyses done—eg analyses of subgroups and interactions, and sensitivity analyses                                                                             |
| <b>Discussion</b>        |       |                                                                                                                                                                            |
| Key results              | 12-13 | Summarise key results with reference to study objectives                                                                                                                   |
| Limitations              | 14    | Discuss limitations of the study, taking into account sources of potential bias or imprecision. Discuss both direction and magnitude of any potential bias                 |
| Interpretation           | 12-13 | Give a cautious overall interpretation of results considering objectives, limitations, multiplicity of analyses, results from similar studies, and other relevant evidence |
| Generalisability         | NA    | Discuss the generalisability (external validity) of the study results                                                                                                      |
| <b>Other information</b> |       |                                                                                                                                                                            |
| Funding                  | 16    | Give the source of funding and the role of the funders for the present study and, if applicable, for the original study on which the present article is based              |

\*Give information separately for exposed and unexposed groups.



# BMJ Open

## Association between preoperative anaemia with length of hospital stay among patients undergoing primary total knee arthroplasty in Singapore: A single centre retrospective study

|                                 |                                                                                                                                                                                                                                                                                                                                                                                                                                                                                                                                  |
|---------------------------------|----------------------------------------------------------------------------------------------------------------------------------------------------------------------------------------------------------------------------------------------------------------------------------------------------------------------------------------------------------------------------------------------------------------------------------------------------------------------------------------------------------------------------------|
| Journal:                        | <i>BMJ Open</i>                                                                                                                                                                                                                                                                                                                                                                                                                                                                                                                  |
| Manuscript ID                   | bmjopen-2017-016403.R1                                                                                                                                                                                                                                                                                                                                                                                                                                                                                                           |
| Article Type:                   | Research                                                                                                                                                                                                                                                                                                                                                                                                                                                                                                                         |
| Date Submitted by the Author:   | 22-Mar-2017                                                                                                                                                                                                                                                                                                                                                                                                                                                                                                                      |
| Complete List of Authors:       | abdullah, hairil; Singapore General Hospital, Department of Anesthesiology<br>Sim, Eileen; Singapore General Hospital, Department of Anaesthesiology<br>Ying, Hao; Singapore General Hospital, Health Services Research Unit<br>Lin, Gengyu; National University Singapore Yong Loo Lin School of Medicine<br>Liew, Geoffrey ; Singapore General Hospital, Department of Anaesthesiology<br>Lamoureux, Ecosse; Singapore Eye Research Institute<br>Tan, Mann Hong; Singapore General Hospital, Department of Orthopaedic Surgery |
| <b>Primary Subject Heading</b>: | Health services research                                                                                                                                                                                                                                                                                                                                                                                                                                                                                                         |
| Secondary Subject Heading:      | Haematology (incl blood transfusion), Surgery, Anaesthesia                                                                                                                                                                                                                                                                                                                                                                                                                                                                       |
| Keywords:                       | Anaemia < HAEMATOLOGY, ORTHOPAEDIC & TRAUMA SURGERY, HEALTH SERVICES ADMINISTRATION & MANAGEMENT, Blood bank & transfusion medicine < HAEMATOLOGY, Anaesthesia in orthopaedics < ANAESTHETICS                                                                                                                                                                                                                                                                                                                                    |
|                                 |                                                                                                                                                                                                                                                                                                                                                                                                                                                                                                                                  |

SCHOLARONE™  
Manuscripts

1  
2  
3 1 **Title:** Association between preoperative anaemia with length of hospital stay among patients  
4 2 undergoing primary total knee arthroplasty in Singapore: A single centre retrospective study  
5 3 Short Title: Preoperative anaemia, total knee arthroplasty  
6 4

7 5 **Running Head:**

8 6 Abdullah HR, Sim YE, Y Hao, Lin GY, Liew GHC, EL Lamoureux, Tan MH  
9 7

10 8 Hairil Rizal ABDULLAH (Corresponding author)

11 9 Department of Anesthesiology,

12 10 Singapore General Hospital

13 11 169608, Singapore

14 12 Hairil.rizal.abdullah@singhealth.com.sg  
15 13

16 14 Yilin Eileen SIM

17 15 Department of Anesthesiology

18 16 Singapore General Hospital,

19 17 169608, Singapore  
20 18

21 19 Ying HAO

22 20 Health Services Research Unit,

23 21 Singapore General Hospital

24 22 169608, Singapore  
25 23

26 24 Geng Yu LIN

27 25 Yong Loo Lin School of Medicine,

28 26 National University of Singapore  
29 27

30 28 Geoffrey Haw Chieh LIEW

31 29 Department of Anesthesiology

32 30 Singapore General Hospital

33 31 169608, Singapore  
34 32

35 33 Ecosse L LAMOUREUX

36 34 Duke-NUS Medical School

37 35 169857, Singapore  
38 36

39 37 Mann Hong TAN

40 38 Department of Orthopaedics

41 39 Singapore General Hospital

42 40 169608, Singapore  
43 41

44 42 Details of corresponding author

45 43 Email: Hairil.rizal.abdullah@singhealth.com.sg

46 44 Key words: Anemia; Arthroplasty, knee replacement; length of stay;

47 45 Number of Tables: 3  
48  
49  
50  
51  
52  
53  
54  
55  
56  
57  
58  
59  
60

1  
2  
3 1 Conflict of Interest: None to declare

4 2 Financial support: None

5 3  
6  
7  
8  
9  
10  
11  
12  
13  
14  
15  
16  
17  
18  
19  
20  
21  
22  
23  
24  
25  
26  
27  
28  
29  
30  
31  
32  
33  
34  
35  
36  
37  
38  
39  
40  
41  
42  
43  
44  
45  
46  
47  
48  
49  
50  
51  
52  
53  
54  
55  
56  
57  
58  
59  
60

For peer review only

## 1 **Abstract**

2 **Objectives:** Studies in western healthcare settings suggest that preoperative anaemia is  
3 associated with poor outcomes after elective orthopaedic surgery. We investigated the  
4 prevalence of preoperative anaemia among primary unilateral total knee arthroplasty patients in  
5 Singapore and its association with length of hospital stay (LOS), perioperative blood transfusion  
6 and hospital readmission rates.

7 **Methods:** Retrospective cohort study performed in a tertiary academic medical centre in  
8 Singapore. Data of patients who underwent primary unilateral TKA between January 2013 to  
9 June 2014, such as demographics, comorbidities, preoperative haemoglobin level, LOS and 30-  
10 day readmission data were collected. Anaemia severity was graded according to WHO  
11 classification. Multivariate logistic regression were performed to identify factors that predispose  
12 to prolonged LOS. Prolonged LOS was defined as more than 6 days, which corresponds  
13 to >75th centile LOS of the data.

14 **Results:** We analysed 2394 patients. The prevalence of anaemia was 23.7%. 403 patients  
15 (16.8%) had mild anaemia and 164 patients (6.8%) had moderate to severe anaemia. The  
16 mean LOS for all patients was 5.4±4.8 days. Based on multivariate logistic regression,  
17 preoperative anaemia significantly increased LOS (mild anaemia, aOR 1.71, p<0.001;  
18 moderate/severe anaemia, aOR 2.29, p<0.001). Transfusion of 1 unit red cell increased odds of  
19 prolonged LOS (aOR 2.12, p=0.006) and transfusion of 2 or more units had even higher odds of  
20 prolonged LOS (aOR 6.71, p<0.001). Repeat operation during hospital stay, previous  
21 cerebrovascular accidents, general anaesthesia and age>70 years were associated with  
22 prolonged LOS. There were 42 (1.7%) cases of related readmission within 30 days. Due to the  
23 low number, no statistical analysis for hospital readmission was done.

24 **Conclusion:** Anaemia is common among patients undergoing elective total knee arthroplasty in  
25 Singapore and is independently associated with prolonged length of stay and increased  
26 perioperative blood transfusion.

27  
28 Word count: 286

29 Keywords: Anaemia; Arthroplasty, knee replacement; length of stay; perioperative blood  
30 transfusion, patient blood management

### Strengths:

- Our study provides a unique perspective from a South East Asian healthcare system on anaemia and its impact on LOS and hospital readmission rates after unilateral, primary total knee arthroplasty.
- We had minimal incomplete data (2.0%) due to the rigorous mandatory preoperative assessment database.
- Our study is one of the first to control for the day of the week the surgery was done, which was recently found to be a significant predictor for LOS in arthroplasties.

### Limitations:

- This is a retrospective observational study, so it cannot establish a causal relationship between preoperative anaemia and adverse outcomes
- The selection of the 75th centile for defining prolonged LOS can be viewed as an arbitrary cut-off, although it is also used in other literature examining LOS after elective surgery.

### Introduction

The prevalence of preoperative anaemia in patients undergoing non-cardiac surgery is considerably high, with rates of 30.4% and 28.7% recorded in the US and Europe respectively.[1]. This is an important health problem as even mild anemia is associated with poor outcomes post-surgery [1, 3–6], including prolonged length of hospital stay (LOS) and higher readmission rates [7, 8] .

Total knee arthroplasty (TKA) is one of the most common orthopaedic procedures worldwide [2,3]. Due to the low mortality and morbidity rates associated with TKA, improvement initiatives have mainly focused on reducing LOS and improving functional recovery after surgery [4,5]. LOS associated with TKA is directly correlated with the total procedure cost, mainly due to provision of inpatient services [6,7]. Reductions in LOS can therefore help to reduce the economic burden of TKA [8,9]. Due to the fixed bed capacity, high overhead costs, and the

1  
2  
3 1 Diagnosis-Related Group (DRG) reimbursement system in most health systems, the economic  
4 2 revenue of these systems depends on an increase in patient throughput by decreasing LOS.  
5 3 Additionally, unexpected prolonged LOS could negatively impact the patient's perspective of a  
6 4 good surgical outcome. Hence, it is important for health systems and physicians to identify  
7 5 modifiable risk factors that are associated with the improved recovery and discharge of these  
8 6 patients. Most studies examining the association between hospital LOS after joint arthroplasties  
9 7 and preoperative anaemia [10–17] were conducted within the western healthcare settings, with  
10 8 different demographics, potentially diverse discharge and rehabilitation policies from other  
11 9 regions in the world.

12 10 Therefore, in this study, we set out to investigate the relationship between preoperative  
13 11 anaemia and hospital LOS, perioperative blood transfusion as well as 30-day readmission rate  
14 12 among patients undergoing primary unilateral TKA in Singapore.

## 15 13

### 16 14 **Methods**

17 15 Institutional Review Board approval was obtained (Singhealth CIRB 2014/651/D) prior to  
18 16 the start of the study. The electronic medical records of all 2676 patients who underwent TKA  
19 17 between January 2013 and June 2014 in our institution were analysed. These clinical records  
20 18 were sourced from our institution's clinical information system (Sunrise Clinical Manager (SCM),  
21 19 Allscripts, IL, USA) and stored in our enterprise data repository and analytics system  
22 20 (SingHealth-IHiS Electronic Health Intelligence System - eHINTS), which integrates information  
23 21 from administration, clinical and ancillary healthcare systems. We generated a list of patients  
24 22 who underwent total knee replacements from January 2013 to June 2014 using specific surgical  
25 23 codes relevant to this surgery. Information from SCM included patient demographics,  
26 24 preoperative comorbidities such as smoking, haemoglobin level, individual components of the  
27 25 Revised Risk Cardiac Index [18,19], such as a history of previous cerebrovascular accidents  
28 26 (CVA), ischemic heart disease (IHD), congestive cardiac failure (CCF), diabetes mellitus (DM)  
29 27 on insulin and elevated preoperative creatinine level >2mg/dL; ASA score [20]; details of the  
30 28 operation such as site, duration, type of anaesthesia and day of week the surgery was done  
31 29 [21]; perioperative blood transfusion and repeat surgeries during hospital stay were also  
32 30 obtained. The length of stay (LOS) was calculated from the date of admission, to the date of  
33 31 discharge from hospital to their home environment. 30-day readmission data after discharge

1 was obtained from the clinical information system database, SCM. We filtered related  
2 readmission by the ICD-10 diagnosis, and further confirmed the cause of admission by looking  
3 up the patient's electronic medical records. We defined the window for preoperative  
4 haemoglobin levels to be taken at a maximum of 14 days and a minimum of one day before the  
5 surgery. We also defined perioperative blood transfusion to be within 2 weeks before up to 2  
6 weeks after the date of surgery.

7  
8 In our institution, most patients are admitted on the day of surgery and very infrequently,  
9 1 day earlier for medical and/or social reasons. Routinely, all anti-platelet medications apart  
10 from Aspirin are stopped for the recommended duration before the surgery. The use of  
11 intraoperative tranexamic acid infiltration to the knee joint, intravenous tranexamic acid and the  
12 placement of a drain into the joint after the surgery is not standardized. Use of cell salvage is  
13 rare. Postoperatively, all patients receive a standard hospital TKA protocol for postoperative  
14 care and discharge. This includes thromboembolism chemoprophylaxis with 40 mg once daily  
15 subcutaneous low molecular weight heparin (Clexane, Sanofi, Paris, France) on the first  
16 postoperative day, which is discontinued upon discharge. Patients also receive routine  
17 physiotherapy starting from the first postoperative day, even if it falls on the weekend. They are  
18 deemed fit for discharge when there is an agreement between the surgeon and physiotherapist  
19 that the patient is medically stable and that their functional ability is sufficient to allow discharge  
20 to their home environment. This includes being able to climb up a few steps, transfer with the  
21 aid of a walking frame and to bend their operated knee close to 90 degrees.

22 After excluding 51 patients with more than 3 missing variables, 3 patients who did not  
23 have pre-operative haemoglobin levels, 22 patients who underwent revision surgery and 206  
24 patients who underwent bilateral surgery, we obtained 2394 patients in the final analysis (Figure  
25 1). No sensitivity analysis accounting for the missing data was done due to the small number  
26 (2.0%).

27  
28 The primary outcome was prolonged LOS, defined as more than 6 days. This cutoff was  
29 selected as it represents >75th centile LOS of the whole sample. The use of 75th centile to  
30 define prolonged LOS is consistent with other studies [22]. The secondary outcome was  
31 readmission for any reason within 30 days after surgery.

## Statistical analysis

We used the World Health Organisation (WHO)'s gender-based definition of anaemia severity [23]. Thus, mild anaemia was defined as haemoglobin concentration of 11-12.9g/dL in males and 11-11.9g/dL in females; moderate anaemia was defined for both genders to be haemoglobin concentration between 8-10.9g/dL and severe anaemia defined as haemoglobin concentration <8.0g/dL. Among the 567 patients (23.7%) with anaemia, 403 patients (16.8%) had mild preoperative anaemia, 159 patients (6.6%) had moderate anaemia and 5 patients had severe anaemia (0.2%). Due to the small incidence of severe anaemia in the sample, patients with moderate and severe anaemia were analyzed together.

Patient demographics and clinical characteristics were compared between LOS >6 and ≤6 days (Table 1). For continuous variables, mean and standard deviation (SD) were presented and Mann-Whitney U test was used to test the mean differences between the 2 groups. For categorical variables, Chi-square test was used to compare the proportions between the 2 groups. We categorized continuous variable such as age according to their broad centile groups, BMI according to the WHO definition of obesity, and operative duration according to ≤100 minutes or > 100 minutes which corresponds to >75th centile of the data. Multivariate logistic regression was performed to determine independent predictors for increased LOS (Table 2) and perioperative blood transfusion (Table 3) while adjusting for demographic, preoperative clinical risk factors and surgical factors. We repeated the logistic regression for LOS with non-gender based cutoffs for anemia to see if it yielded significantly different results from the WHO definition of anaemia. No anemia was defined as Hb ≥ 13.0g/dL, mild anemia as Hb 11.0-12.9 g/dL and moderate/severe anemia as Hb < 11.0g/dL. Finally, we also constructed General Linear Model (GLM) with our data, taking LOS and hemoglobin as continuous variables, to assess the effect size of every unit rise in Hb on LOS. We found little presence of collinearity between hemoglobin level and perioperative blood transfusion and their effect on LOS based on linear regression. However, in our GLM model, the addition of perioperative blood transfusion as a variable reduced the significance and effect size of preoperative hemoglobin level, hence both models with and without perioperative blood transfusion were performed and presented. All analyses were performed using IBM SPSS Statistics v21.



1 **Results**

2 Table 1. Demographics of patients with normal Length of Stay (LOS) ( $\leq$  6 days) versus those  
 3 with prolonged LOS ( $>$  6 days) after Primary Unilateral Total Knee Replacement (TKR)

| Variable                                      |                 | Length of stay $\leq$<br>6 days<br>N=1933 | Length of stay $>$<br>6 days<br>N= 461 | P-value |
|-----------------------------------------------|-----------------|-------------------------------------------|----------------------------------------|---------|
| <b>Patient demographics</b>                   |                 |                                           |                                        |         |
| Age – mean (sd)                               |                 | 65.9 (8.0)                                | 69.2 (8.6)                             | <0.001  |
| Race – n (%)                                  | Chinese         | 1628 (84.2)                               | 385 (83.5)                             | 0.02    |
|                                               | Malay           | 148 (7.7)                                 | 23 (5.0)                               |         |
|                                               | Indian          | 106 (5.5)                                 | 31 (6.7)                               |         |
|                                               | Others          | 51 (2.6)                                  | 22 (4.8)                               |         |
| Body Mass Index –<br>n (%)                    | < 25            | 555 (29.2)                                | 138 (31.8)                             | 0.16    |
|                                               | 25 – 29.9       | 812 (42.7)                                | 182 (41.9)                             |         |
|                                               | 30 – 34.9       | 410 (21.5)                                | 77 (17.7)                              |         |
|                                               | $\geq$ 35       | 126 (6.6)                                 | 37 (8.5)                               |         |
| Gender – n (%)                                | Male            | 477 (24.7)                                | 102 (22.1)                             | 0.25    |
|                                               | Female          | 1456 (75.3)                               | 359 (77.9)                             |         |
| <b>Details of Operation</b>                   |                 |                                           |                                        |         |
| Type of Anaesthesia – n (%)                   | GA              | 649 (33.6)                                | 184 (39.9)                             | 0.01    |
|                                               | RA              | 1284 (66.4)                               | 277 (60.1)                             |         |
| Duration of operation – minutes (sd)          |                 | 79.6 (21.6)                               | 84.9 (27.5)                            | <0.001  |
| Perioperative Blood Transfusion – n (%)       | None            | 1879 (97.2)                               | 394 (85.5)                             | <0.001  |
|                                               | 1 unit          | 43 (2.2)                                  | 37 (8.0)                               |         |
|                                               | $\geq$ 2units   | 11 (0.6)                                  | 30 (6.5)                               |         |
| Repeat Operation within Hospital Stay – n (%) | Yes             | 1 (0.1)                                   | 6 (1.3)                                | <0.001  |
| Day of Week of Operation – n (%)              | Monday          | 307 (15.9)                                | 90 (19.5)                              | <0.001  |
|                                               | Tuesday         | 424 (21.9)                                | 119 (25.8)                             |         |
|                                               | Wednesday       | 326 (16.9)                                | 84 (18.2)                              |         |
|                                               | Thursday        | 472 (24.4)                                | 63 (13.7)                              |         |
|                                               | Friday          | 301 (15.6)                                | 86 (18.7)                              |         |
|                                               | Saturday        | 103 (5.3)                                 | 19 (4.1)                               |         |
| <b>Patient comorbidities</b>                  |                 |                                           |                                        |         |
| Anaemia – n (%)                               | None            | 1537 (79.5)                               | 290 (62.9)                             | <0.001  |
|                                               | Mild            | 294 (15.2)                                | 109 (23.6)                             |         |
|                                               | Moderate/Severe | 102 (5.3)                                 | 62 (13.4)                              |         |



|                                       |                 |                      |        |                      |        |
|---------------------------------------|-----------------|----------------------|--------|----------------------|--------|
| Repeat Operation within Hospital Stay |                 | 25.48 (3.06, 212.14) | 0.003  | 15.22 (1.38, 167.59) | 0.03   |
| Day of Week of Operation              | Monday          | 2.20 (1.54, 3.13)    | <0.001 | 2.38 (1.62, 3.49)    | <0.001 |
|                                       | Tuesday         | 2.10 (1.51, 2.93)    | <0.001 | 2.42 (1.68, 3.49)    | <0.001 |
|                                       | Wednesday       | 1.93 (1.35, 2.76)    | <0.001 | 2.21 (1.50, 3.24)    | <0.001 |
|                                       | Thursday        | REF                  |        | REF                  |        |
|                                       | Friday          | 2.14 (1.50, 3.06)    | <0.001 | 1.99 (1.35, 2.94)    | 0.001  |
|                                       | Saturday        | 1.38 (0.79, 2.41)    | 0.25   | 1.46 (0.80, 2.67)    | 0.22   |
| <b>Patient comorbidities</b>          |                 |                      |        |                      |        |
| Anaemia                               | None            | REF                  |        | REF                  |        |
|                                       | Mild            | 1.97 (1.53, 2.53)    | <0.001 | 1.71 (1.29, 2.27)    | <0.001 |
|                                       | Moderate/Severe | 3.22 (2.29, 4.53)    | <0.001 | 2.29 (1.54, 3.39)    | <0.001 |
| DM on insulin                         |                 | 1.55 (0.77, 3.12)    | 0.22   | 1.20 (0.53, 2.76)    | 0.66   |
| Creatinine > 2mg/dL                   |                 | 4.26 (1.68, 10.78)   | 0.002  | 2.35 (0.78, 7.11)    | 0.13   |
| Previous CVA                          |                 | 3.33 (1.84, 6.01)    | <0.001 | 2.89 (1.50, 5.55)    | 0.001  |
| IHD                                   |                 | 1.92 (1.30, 2.83)    | 0.001  | 1.50 (0.95, 2.36)    | 0.08   |
| CCF                                   |                 | 2.11 (0.79, 5.66)    | 0.14   | 1.19 (0.38, 3.75)    | 0.77   |
| Smoking                               |                 | 0.98 (0.69, 1.39)    | 0.90   | 1.15 (0.76, 1.75)    | 0.50   |
| ASA Score                             | 1               | REF                  |        | REF                  |        |
|                                       | 2               | 1.19 (0.77, 1.83)    | 0.44   | 0.96 (0.61, 1.52)    | 0.86   |
|                                       | 3               | 2.88 (1.68, 4.92)    | <0.001 | 1.40 (0.77, 2.56)    | 0.27   |

Legend: REF = reference

**Table 3. Factors associated with Perioperative Blood Transfusion after Primary Unilateral TKR**

| Variable                        |       | aOR (95% CI)*        | P-value |
|---------------------------------|-------|----------------------|---------|
| Type of Anaesthesia             | GA    | REF                  |         |
|                                 | RA    | 0.57 (0.37, 0.87)    | 0.009   |
| Duration of operation (minutes) | ≤ 100 | REF                  |         |
|                                 | > 100 | 1.89 (1.14, 3.14)    | 0.014   |
| Repeat Operation                |       | 16.51 (2.22, 123.04) | 0.006   |

|                      |                 |                    |        |
|----------------------|-----------------|--------------------|--------|
| within Hospital Stay |                 |                    |        |
| Anaemia              | None            | REF                |        |
|                      | Mild            | 4.13 (2.54, 6.71)  | <0.001 |
|                      | Moderate/Severe | 9.13 (5.34, 15.61) | <0.001 |
| ASA Score            | 1               | REF                |        |
|                      | 2               | 2.08 (0.63, 6.90)  | 0.23   |
|                      | 3               | 4.00 (1.05, 15.21) | 0.042  |
| CCF                  |                 | 7.71 (2.24, 26.53) | 0.001  |

\* adjusted for all the variables listed in Table 1

Legend: REF = reference

#### Demographics

Of the 2394 patients who underwent primary TKA during the study period, 23.7% were anaemic. 403 patients (16.8%) had mild preoperative anaemia, 159 patients (6.6%) had moderate anaemia and 5 patients had severe anaemia (0.2%). In table 1, patients with prolonged LOS had higher mean age (69.2 years) compared to patients with normal LOS (65.9 years),  $p < 0.001$ . There was no significant difference in BMI or gender distribution between the two groups. However, those with prolonged LOS tended to have a higher ASA score ( $p < 0.001$ ), higher incidence of anaemia ( $p < 0.001$ ), previous CVA ( $p < 0.001$ ), undergo repeat operation within their hospital stay ( $p < 0.001$ ) and received general anaesthesia compared to regional anaesthesia ( $p < 0.01$ ).

#### Length of stay (LOS)

The mean LOS for all TKA patients, was 5.4 days ( $\pm 4.8$  days), with a median of 4 days and 75<sup>th</sup> centile of 6 days. This result is similar to previous published LOS rates of primary unilateral TKA in our institution[24].

461 patients (19.3%) had LOS more than six days (i.e prolonged LOS). Based on the multivariate analysis presented in table 2, the variables associated with independent elevated risk of prolonged LOS include older age  $> 70$  years (aOR 1.94,  $p < 0.001$ ), repeat surgery within LOS (aOR 15.22,  $p = 0.03$ ), having mild anaemia (aOR 1.71,  $p < 0.001$ ) or moderate/severe

1 anaemia (aOR 2.29,  $p < 0.001$ ), and previous cerebrovascular accidents (CVA) (aOR 2.89,  
 2  $p = 0.001$ ). Perioperative blood transfusion of 1 unit independently increased risk of prolonged  
 3 LOS by 2.12 ( $p = 0.006$ ), while transfusion of 2 or more units independently increased risk by  
 4 6.71 ( $p < 0.001$ ). Variables that reduced LOS include having regional anaesthesia (aOR 0.74,  
 5  $p = 0.02$ ), having surgery on Thursday and being of Malay race. BMI, gender, presence of DM on  
 6 insulin, previous diagnosis of ischemic heart disease, previous history of congestive heart failure  
 7 or smoking, and elevated ASA scores were not associated with higher odds of prolonged LOS.

8  
 9 We repeated multivariate logistic regression for LOS with the non-gender based hemoglobin  
 10 cutoffs as described earlier. Compared to no anemia, mild anemia (Hb 11.0-12.9g/dL) had an  
 11 aOR 1.39 (1.09, 1.76,  $p = 0.007$ ) while moderate/severe anemia (Hb  $< 11.0$  g/dL) had an aOR of  
 12 2.35 (1.56, 3.54,  $p < 0.001$ ) of prolonged LOS ( $> 6$  days). These results were comparable to the  
 13 findings generated with WHO definition of anemia.

#### 14 15 Perioperative blood transfusion

16 Factors that increased risk of perioperative blood transfusion (Table 3) included repeat  
 17 operation during hospital stay (aOR 16.51,  $p = 0.006$ ), presence of mild anaemia (aOR 4.13,  
 18  $p < 0.001$ ) and moderate/severe anaemia (aOR 9.13,  $p < 0.001$ ), ASA score of 3 (aOR 4.00,  
 19  $p = 0.04$ , and history of CCF (aOR 7.71,  $p = 0.001$ ). Regional anaesthesia was found to reduce  
 20 risk of perioperative blood transfusion (aOR 0.57,  $p = 0.009$ ).

#### 21 22 Effect size of Hemoglobin on LOS

23 As shown in Table 4, when perioperative transfusion was excluded, every 1g increase in  
 24 preoperative hemoglobin reduced LOS by 0.2 days (95% CI 0.08,0.34,  $p = 0.002$ ). However, after  
 25 including perioperative transfusion, every 1g increase in preoperative hemoglobin reduced LOS  
 26 minimally by 0.07 days (95% CI -0.20, 0.06,  $p = 0.28$ ).

27  
 28 Table 4. Effect size of every 1g increase in Hb, with and without factoring effect of perioperative  
 29 blood transfusion based on General Linear Model

| Without adjusting for Perioperative Transfusion * |                                 |         |
|---------------------------------------------------|---------------------------------|---------|
| Hb Increase                                       | Incr in LOS in days<br>(95% CI) | P-value |
|                                                   |                                 |         |

|                                                            |           |                      |        |
|------------------------------------------------------------|-----------|----------------------|--------|
|                                                            | 1g        | -0.21 (-0.34, -0.08) | 0.002  |
|                                                            | 2g        | -0.42 (-0.68, -0.16) | 0.002  |
|                                                            | 3g        | -0.63 (-1.01, -0.24) | 0.002  |
| After adjusting for Perioperative Transfusion <sup>+</sup> |           |                      |        |
| Perioperative Transfusion                                  | 0 units   | REF                  |        |
|                                                            | 1 unit    | 4.02 (3.01, 5.03)    | <0.001 |
|                                                            | ≥ 2 units | 8.35 (6.97, 9.73)    | <0.001 |
| Per unit increase in Hb by 1g                              |           | -0.07 (-0.20, 0.06)  | 0.28   |

1 \* R<sup>2</sup> =0.114, adjusted R<sup>2</sup>=0.103

2 + R<sup>2</sup> = 0.182, adjusted R<sup>2</sup>=0.171

3 Legend: REF=reference

5 Hospital readmission within 30 days

6 Table 5. Causes of related admission within 30-days of discharge after primary unilateral TKR

| Causes of readmission   | N         |
|-------------------------|-----------|
| Surgical site infection | 13        |
| Pain/Swelling/Stiffness | 11        |
| Non-infective Wound     |           |
| Discharge               | 5         |
| Deep Vein Thrombosis    | 4         |
| Periprosthetic Fracture | 3         |
| Hematoma/bleeding       | 2         |
| Erythema                | 2         |
| Contact Dermatitis      | 1         |
| Wound Dehiscence        | 1         |
| <b>Grand Total</b>      | <b>42</b> |

7  
8 We had 42 cases of related readmission within 30 days of discharge out of 2394 cases (1.7%)  
9 (Table 5). Due to the low rates of readmission, no further statistical analysis was done.

## 11 Discussion

12 In this retrospective cohort study of 2394 consecutive patients who underwent elective  
13 primary TKA in our center, the prevalence of preoperative anaemia, as defined by the WHO  
14 gender-based classification, was found to be at 23.7%. Patients with mild preoperative anaemia  
15 had an adjusted Odd Ratio of prolonged LOS (> 6 days) of 1.71, while patients with

13

1 moderate/severe anemia had an adjusted Odds Ratio of 2.29. Our findings are consistent with  
2 previous studies which explored the relationship between preoperative anaemia and LOS in  
3 elective primary knee arthroplasties. For example, Jans et al. found preoperative anaemia to be  
4 an independent predictor of prolonged LOS among patients undergoing “fast-track” knee  
5 arthroplasty [11]. This is similar with another observational study, conducted in the “traditional  
6 pathway” environment for elective primary knee arthroplasty [25]. As these studies were done in  
7 the western world health systems and a wide disparity in postoperative hospital stays after TKA  
8 has been documented due to the [26–29] variations in practice and rehabilitation protocols  
9 between countries, our study provided a perspective from a South East Asian healthcare  
10 system. In countries with advanced healthcare systems and an ageing population, the  
11 exponentially increasing number of TKAs performed yearly [3] importunes that more effort is  
12 needed to identify modifiable risk factors for delayed hospital discharges.

13 In addition, we have also found that every 1g increase in preoperative Hb reduces the  
14 patient’s LOS in hospital by 0.2 days. While this number is small, when we consider that the  
15 presence of preoperative anemia is one of the strongest independent predictor of perioperative  
16 blood transfusion (mild anemia is associated with aOR of blood transfusion of 4.13,  $p < 0.001$ ;  
17 moderate severe anemia with aOR of transfusion of 9.13,  $p < 0.001$ ), which on its own has a  
18 strong independent influence on prolonging LOS, preoperative anemia becomes clinically  
19 important. Thus, optimizing preoperative anemia becomes an important health care cost  
20 containment strategy, especially since TKAs are elective procedures that can be postponed to  
21 allow optimization of risk factors for suboptimal outcomes. Other studies have also found  
22 preoperative anaemia to be a strong predictor for perioperative allogeneic blood transfusion in  
23 knee surgeries[30,31], which is associated with poorer outcomes and prolonged LOS [11,32]. In  
24 our study, the transfusion of 1unit of blood is associated with aOR of prolonged LOS of 2.12,  
25  $p = 0.006$ , while transfusion of 2 or more units has an aOR of 6.71,  $p < 0.001$ .

26 Our study adds to the growing body of publications from Asian countries on the negative  
27 impact of preoperative anemia on postoperative outcomes in orthopaedic and non-orthopaedic  
28 surgeries[33,34]. International guidelines now recommend patient blood management programs  
29 with early detection of preoperative anaemia to identify the cause and treat any underlying  
30 reversible causes, such as iron-deficiency anaemia[35]. Such intervention can reduce  
31 postoperative blood transfusion, LOS and readmission. In particular, iron deficiency anemia is

1  
2  
3 1 amenable to administration of IV iron treatment. Froessler et al demonstrated that preoperative  
4 2 intravenous iron treatment of iron deficiency anaemia among patients who underwent major  
5 3 abdominal surgery resulted in reduction of median LOS by three days [36]. In the UK,  
6 4 preoperative iron supplementation prior to elective hip/knee arthroplasty has reduced  
7 5 transfusion rates, 90-day readmission rates and halved median hospital LOS[37]. In Australia,  
8 6 transfusion rates have also been reduced since similar interventions for the same surgeries[38].  
9 7 Unfortunately in our institution, further evaluation and management of anaemia is often left to  
10 8 the ordering physician's discretion, and a more systematic approach to the detection and  
11 9 management of preoperative anaemia is timely.

12  
13  
14  
15  
16  
17  
18  
19  
20  
21  
22  
23  
24  
25  
26  
27  
28  
29  
30  
31  
32  
33  
34  
35  
36  
37  
38  
39  
40  
41  
42  
43  
44  
45  
46  
47  
48  
49  
50  
51  
52  
53  
54  
55  
56  
57  
58  
59  
60

10 One of the aims of our study was to identify the risk factors for 30-day hospital  
11 readmission in our study population. However, we were unable to do so due to the small  
12 incidence of 42 readmissions out of 2349 cases, which precludes any meaningful analysis. Our  
13 30-day related readmission rates are similar to previous published rate in our institution, which  
14 is between 1.7-2.9% for primary unilateral TKR.[24]. This is lower than the 30-day all-cause  
15 readmission rates in literature of 4.0 -5.5% [39–41], because it only looks at readmission that is  
16 related to complications attributable to the surgery. Nevertheless, our readmission rates are  
17 similar to Schairer et al's 30-day surgical readmission rate of 2.4%, of which cellulitis and  
18 surgical site infection are the most common causes. In our study, surgical site infection was also  
19 the most common cause of readmission (31.1%).

### 21 Strengths of study

22 One of the strengths of our study was that it is amongst the first few to control for the day  
23 of the week the surgery was done, which has recently been shown to affect LOS in TKA and  
24 total hip arthroplasty [21]. We found that having surgery on Thursday is significantly associated  
25 with the lowest odds of prolonged LOS. We postulate that this is because patients would have  
26 received standard physiotherapy for at least two days, on Friday and Saturday, and may be  
27 inclined to go home on Sunday where there is more familial support at home.

28 Another strength of our study is that we included both subjective measures of clinical risk  
29 estimates such as the ASA score [27,43], as well as the components of the RCRI which  
30 comprise of diagnosis of specific conditions. This allowed us to find that out of the 5 clinical  
31 conditions within the RCRI score, only a history of previous CVA was significantly associated



1  
2  
3 1 with increased LOS (aOR 2.89, p=0.001). Furthermore, a history of CCF was found to be  
4 2 associated with increased risk of perioperative blood transfusion (aOR 7.71, p=0.001).

5 3  
6 4 Finally, we focused our study on patients who underwent primary total knee arthroplasty  
7 5 rather than combining hip and knee arthroplasty together, which is more commonly done in  
8 6 literature, as we wanted a more homogenous study population. We excluded revision and  
9 7 bilateral TKA as they are known in literature to be associated with increased need for blood  
10 8 transfusion and LOS.[42,43].

11 9  
12 10 Our study recruitment occurred over 1.5 years. Our recruitment period is similar to  
13 11 another study published on this topic, which recruited over a 2 year period[11]. We feel that this  
14 12 is an advantage as no major changes in health care and discharge policy occurred during this  
15 13 short time frame that would influence our primary outcome of LOS.

#### 16 14 Limitations of study

17 15 We also had a modest study cohort of 2349 patients which is comparable to other  
18 16 studies [11,39]. While our study was performed retrospectively, it had minimal missing data  
19 17 (2.0%). This may be due to the fact that our clinical data, such as the preoperative variables,  
20 18 were collected electronically in a mandatory, prospective manner during routine preoperative  
21 19 anaesthesia assessment. Due to the observational nature of the study, a causal relationship  
22 20 between preoperative anaemia and adverse outcomes is difficult to establish. In addition, while  
23 21 our selection of the 75th centile for defining prolonged LOS can be viewed as an arbitrary cut-off  
24 22 in the absence of a universal definition of prolonged LOS, the use of 75th centile has been done  
25 23 in literature before for a similar study [22]. We do not have data on whether drains were placed  
26 24 by the surgeons during the surgery, however, a recent study done in the same institution  
27 25 showed that while drains were associated with a larger drop in Hb level and greater total blood  
28 26 loss, it did not significantly impact blood transfusion rate, LOS or 30-day readmission rates[24].  
29 27 We also did not have data on the prevalence of the use of intraoperative tranexamic acid  
30 28 infiltration into the joint, administration of IV tranexamic acid by the anesthesiologists, or use of  
31 29 leucodepleted blood products for transfusion. Non-leucodepleted blood has been postulated to  
32 30 reduce transfusion related immunomodulatory (TRIM) effects including mortality[44], although  
33 31 clinical studies in cardiac surgery have not proven to be conclusive so far[45,46].

## Conclusion

In conclusion, we found the prevalence of preoperative anaemia to be 23.7% among patients who underwent primary total knee arthroplasty in Singapore. It was an independent risk factor for prolonged length of hospital stay and perioperative blood transfusion. We suggest measures to correct anaemia prior to surgery should be considered.

## **Acknowledgements**

We would like to thank Ms Serene Ong, Academic Medicine Research Institute, Duke-NUS Medical School, for her help in manuscript preparation. We also like to thank Ms Sudha Hari Krishnan, from the Department of Anaesthesiology, for her invaluable help in data extraction. This research received no specific grant from any funding agency in the public, commercial or not-for-profit sectors.

Lastly, we would also like to thank Dr Chan Yiong Huak, Head, Biostatistics Unit, Yong Loo Lin School of Medicine, National University of Singapore, National University Health System, Singapore for his invaluable help in data analysis and interpretation.

## **Contributorship statement**

Abdullah HR - Contributed to the study conception and design, data acquisition, analysis and interpretation, drafting and final approval of the manuscript.

Sim YE – Contributed to data analysis and interpretation, drafting, revision and final approval of the manuscript

Y Hao – Contributed to data analysis and interpretation, drafting of the manuscript and final approval

Lin GY – Contributed to data acquisition, analysis and interpretation, drafting of the manuscript and final approval

Liew GHC - Contributed to the study conception and design, data analysis, revision of the manuscript and final approval

EL Lamoureux – Contributed to data analysis and critical appraisal, revision and final approval of the manuscript.

MH Tan – Contributed to the study conception and design, drafting of manuscript and final

1  
2  
3 1 approval.  
4  
5 2  
6 3  
7

8 4 **Competing interests**

9 5 No conflicts of interest to declare.  
10  
11 6

12 7 **Funding**

13  
14 8 This research was funded by the hospital department funds.  
15  
16 9

17 10 **Data Sharing**

18  
19 11 Full dataset can be downloaded from <http://dx.doi.org/10.5061/dryad.73250/1>  
20  
21 12

22 13 **Figure Legends**

23  
24 14 Figure 1. TKA – total knee arthroplasty  
25  
26 15  
27 16  
28 17  
29 18  
30 19  
31 20  
32 21  
33  
34  
35  
36  
37  
38  
39  
40  
41  
42  
43  
44  
45  
46  
47  
48  
49  
50  
51  
52  
53  
54  
55  
56  
57  
58  
59  
60

1  
2  
3 1  
4 2  
5 3  
6 **References**  
7

- 8 4 1 Baron DM, Hochrieser H, Posch M, *et al.* Preoperative anaemia is associated with poor  
9 5 clinical outcome in non-cardiac surgery patients. *Br J Anaesth* 2014;**113**:416–23.  
10  
11 6 2 HCUPnet: A tool for identifying, tracking, and analyzing national hospital statistics.  
12 7 <http://hcupnet.ahrq.gov/> (accessed 15 Aug2016).  
13  
14 8 3 Maradit Kremers H, Larson DR, Crowson CS, *et al.* Prevalence of Total Hip and Knee  
15 9 Replacement in the United States. *J Bone Joint Surg Am* 2015;**97**:1386–97.  
16  
17 10 4 den Hertog A, Gliesche K, Timm J, *et al.* Pathway-controlled fast-track rehabilitation after  
18 11 total knee arthroplasty: a randomized prospective clinical study evaluating the recovery  
19 12 pattern, drug consumption, and length of stay. *Arch Orthop Trauma Surg* 2012;**132**:1153–  
20 13 63.  
21  
22 14 5 Husted H, Jensen CM, Solgaard S, *et al.* Reduced length of stay following hip and knee  
23 15 arthroplasty in Denmark 2000–2009: from research to implementation. *Arch Orthop Trauma*  
24 16 *Surg* 2011;**132**:101–4.  
25  
26 17 6 Healy WL, Rana AJ, Iorio R. Hospital economics of primary total knee arthroplasty at a  
27 18 teaching hospital. *Clin Orthop Relat Res* 2011;**469**:87–94.  
28  
29 19 7 Lovald ST, Ong KL, Malkani AL, *et al.* Complications, mortality, and costs for outpatient and  
30 20 short-stay total knee arthroplasty patients in comparison to standard-stay patients. *J*  
31 21 *Arthroplasty* 2014;**29**:510–5.  
32  
33 22 8 Kim S, Losina E, Solomon DH, *et al.* Effectiveness of clinical pathways for total knee and  
34 23 total hip arthroplasty Literature review. *J Arthroplasty* 2003/1;**18**:69–74.  
35  
36 24 9 Ayalon O, Liu S, Flics S, *et al.* A multimodal clinical pathway can reduce length of stay after  
37 25 total knee arthroplasty. *HSS J* 2011;**7**:9–15.  
38  
39 26 10 Liodakis E, Bergeron SG, Zukor DJ, *et al.* Perioperative Complications and Length of Stay  
40 27 After Revision Total Hip and Knee Arthroplasties: An Analysis of the NSQIP Database. *J*  
41 28 *Arthroplasty* 2015;**30**:1868–71.  
42  
43 29 11 Jans Ø, Jørgensen C, Kehlet H, *et al.* Role of preoperative anemia for risk of transfusion  
44 30 and postoperative morbidity in fast-track hip and knee arthroplasty. *Transfusion*  
45 31 2014;**54**:717–26.  
46  
47 32 12 Bs JV, Gomez MM, Restrepo C, *et al.* Preoperative Anemia Increases Postoperative  
48 33 Complications and Mortality Following Total Joint Arthroplasty. *J Arthroplasty*; **30**:846–8.  
49  
50 34 13 Chamieh JS, Tamim HM, Masrouha KZ, *et al.* The Association of Anemia and Its Severity

- 1  
2  
3 1 with Cardiac Outcomes and Mortality After Total Knee Arthroplasty in Noncardiac Patients.  
4 2 *J Arthroplasty* 2016;**31**:766–70.
- 5  
6 3 14 Jans Ø, Jørgensen C, Kehlet H, *et al.* Role of preoperative anemia for risk of transfusion  
7 4 and postoperative morbidity in fast-track hip and knee arthroplasty. *Transfusion* Published  
8 5 Online First: 2014.<http://onlinelibrary.wiley.com/doi/10.1111/trf.12332/full>
- 9  
10 6 15 Pitter FT, Jørgensen CC, Lindberg-Larsen M, *et al.* Postoperative Morbidity and Discharge  
11 7 Destinations After Fast-Track Hip and Knee Arthroplasty in Patients Older Than 85 Years.  
12 8 *Anesth Analg* 2016;**122**:1807–15.
- 13  
14 9 16 Greenky M, Gandhi K, Pulido L, *et al.* Preoperative anemia in total joint arthroplasty: is it  
15 10 associated with periprosthetic joint infection? *Clin Orthop Relat Res* 2012;**470**:2695–701.
- 16  
17 11 17 Husted H, Holm G, Jacobsen S. Predictors of length of stay and patient satisfaction after  
18 12 hip and knee replacement surgery: fast-track experience in 712 patients. *Acta Orthop*  
19 13 2008;**79**:168–73.
- 20  
21 14 18 Fleisher LA, Fleischmann KE, Auerbach AD, *et al.* 2014 ACC/AHA guideline on  
22 15 perioperative cardiovascular evaluation and management of patients undergoing  
23 16 noncardiac surgery: executive summary: a report of the American College of  
24 17 Cardiology/American Heart Association Task Force on Practice Guidelines. *Circulation*  
25 18 2014;**130**:2215–45.
- 26  
27 19 19 Lee TH, Marcantonio ER, Mangione CM, *et al.* Derivation and prospective validation of a  
28 20 simple index for prediction of cardiac risk of major noncardiac surgery. *Circulation*  
29 21 1999;**100**:1043–9.
- 30  
31 22 20 American Society of Anesthesiologists - ASA Physical Status Classification System.  
32 23 [https://www.asahq.org/resources/clinical-information/asa-physical-status-classification-](https://www.asahq.org/resources/clinical-information/asa-physical-status-classification-system)  
33 24 [system](https://www.asahq.org/resources/clinical-information/asa-physical-status-classification-system) (accessed 11 Jul2016).
- 34  
35 25 21 Newman JM, Szubski CR, Barsoum WK, *et al.* Day of Surgery Affects Length of Stay and  
36 26 Charges in Primary Total Hip and Knee Arthroplasty. *J Arthroplasty* Published Online First:  
37 27 29 June 2016. doi:10.1016/j.arth.2016.06.032
- 38  
39 28 22 Almashrafi A, Alsabti H, Mukaddirov M, *et al.* Factors associated with prolonged length of  
40 29 stay following cardiac surgery in a major referral hospital in Oman: a retrospective  
41 30 observational study. *BMJ Open* 2016;**6**:e010764.
- 42  
43 31 23 Health Organization W. Nutritional anaemias: report of a WHO scientific group [meeting  
44 32 held in Geneva from 13 to 17 March 1967]. Published Online First:  
45 33 1968.<http://apps.who.int/iris/handle/10665/40707>
- 46  
47 34 24 Chen JY, Lee WC, Chan HY, *et al.* Drain use in total knee arthroplasty is neither associated  
48 35 with a greater transfusion rate nor a longer hospital stay. *Int Orthop* 2016;**40**:2505–9.

- 1  
2  
3 1 25 Smith IDM, Elton R, Ballantyne JA, *et al.* Pre-operative predictors of the length of hospital  
4 2 stay in total knee replacement. *J Bone Joint Surg Br* 2008;**90**:1435–40.  
5  
6 3 26 Monsef JB, Della Valle AG, Mayman DJ, *et al.* The impact of blood management on length  
7 4 of stay after primary total knee arthroplasty. *Open Orthop J* 2014;**8**:108–13.  
8  
9 5 27 Vorhies JS, Wang Y, Herndon JH, *et al.* Decreased length of stay after TKA is not  
10 6 associated with increased readmission rates in a national Medicare sample. *Clin Orthop*  
11 7 *Relat Res* 2012;**470**:166–71.  
12  
13 8 28 Krämer S, Wenk M, Fischer G, *et al.* Continuous spinal anesthesia versus continuous  
14 9 femoral nerve block for elective total knee replacement. *Minerva Anesthesiol* 2011;**77**:394–  
15 10 400.  
16  
17 11 29 Dauty M, Smitt X, Menu P, *et al.* Which factors affect the duration of inpatient rehabilitation  
18 12 after total knee arthroplasty in the absence of complications? *Ann Phys Rehabil Med*  
19 13 2009;**52**:234–45.  
20  
21 14 30 Salido JA, Marín LA, Gómez LA, *et al.* Preoperative hemoglobin levels and the need for  
22 15 transfusion after prosthetic hip and knee surgery: analysis of predictive factors. *J Bone*  
23 16 *Joint Surg Am* 2002;**84-A**:216–20.  
24  
25 17 31 Carling MS, Jeppsson A, Eriksson BI, *et al.* Transfusions and blood loss in total hip and  
26 18 knee arthroplasty: a prospective observational study. *J Orthop Surg Res* 2015;**10**:48.  
27  
28 19 32 Whitlock EL, Kim H, Auerbach AD. Harms associated with single unit perioperative  
29 20 transfusion: retrospective population based analysis. *BMJ* 2015;**350**:h3037.  
30  
31 21 33 Jung D-H, Lee H-J, Han D-S, *et al.* Impact of perioperative hemoglobin levels on  
32 22 postoperative outcomes in gastric cancer surgery. *Gastric Cancer* 2013;**16**:377–82.  
33  
34 23 34 Zhang L, Yin P, Lv H, *et al.* Anemia on Admission Is an Independent Predictor of Long-  
35 24 Term Mortality in Hip Fracture Population: A Prospective Study With 2-Year Follow-Up.  
36 25 *Medicine* 2016;**95**:e2469.  
37  
38 26 35 Goodnough LT, Maniatis A, Earnshaw P, *et al.* Detection, evaluation, and management of  
39 27 preoperative anaemia in the elective orthopaedic surgical patient: NATA guidelines. *Br J*  
40 28 *Anaesth* 2011;**106**:13–22.  
41  
42 29 36 Froessler B, Palm P, Weber I, *et al.* The Important Role for Intravenous Iron in  
43 30 Perioperative Patient Blood Management in Major Abdominal Surgery: A Randomized  
44 31 Controlled Trial. *Ann Surg* 2016;**264**:41–6.  
45  
46 32 37 Frew N, Alexander D, Hood J, *et al.* Impact of a blood management protocol on transfusion  
47 33 rates and outcomes following total hip and knee arthroplasty. *Ann R Coll Surg Engl*  
48 34 2016;**98**:380–6.  
49  
50 35 38 Kopanidis P, Hardidge A, McNicol L, *et al.* Perioperative blood management programme

- 1  
2  
3 1 reduces the use of allogenic blood transfusion in patients undergoing total hip and knee  
4 2 arthroplasty. *J Orthop Surg Res* 2016;**11**:28.  
5  
6 3 39 Schairer WW, Vail TP, Bozic KJ. What are the rates and causes of hospital readmission  
7 4 after total knee arthroplasty? *Clin Orthop Relat Res* 2014;**472**:181–7.  
8  
9 5 40 Brown NM, Sheth NP, Davis K, *et al*. Total knee arthroplasty has higher postoperative  
10 6 morbidity than unicompartmental knee arthroplasty: a multicenter analysis. *J Arthroplasty*  
11 7 2012;**27**:86–90.  
12  
13 8 41 Huddleston JI, Maloney WJ, Wang Y, *et al*. Adverse events after total knee arthroplasty: a  
14 9 national Medicare study. *J Arthroplasty* 2009;**24**:95–100.  
15  
16 10 42 Callaghan JJ, Spitzer AI. Blood management and patient specific transfusion options in  
17 11 total joint replacement surgery. *Iowa Orthop J* 2000;**20**:36–45.  
18  
19 12 43 Robinson S, McGonigle O, Volin S, *et al*. Comprehensive Look at Blood Transfusion  
20 13 Utilization in Total Joint Arthroplasty at a Single Academic Medical Center under a Single  
21 14 Surgeon. *J Blood Transfus* 2013;**2013**:983250.  
22  
23 15 44 FAQ: Leucodepletion of red cells and platelets from Australian Red Cross Blood Service.  
24 16 [https://www.transfusion.com.au/blood\\_products/components/leucodepletion](https://www.transfusion.com.au/blood_products/components/leucodepletion) (accessed 16  
25 17 Mar2017).  
26  
27 18 45 Murphy GJ, Reeves BC, Rogers CA, *et al*. Increased mortality, postoperative morbidity, and  
28 19 cost after red blood cell transfusion in patients having cardiac surgery. *Circulation*  
29 20 2007;**116**:2544–52.  
30  
31 21 46 McQuilten ZK, Andrianopoulos N, van de Watering L, *et al*. Introduction of universal  
32 22 prestorage leukodepletion of blood components, and outcomes in transfused cardiac  
33 23 surgery patients. *J Thorac Cardiovasc Surg* 2015;**150**:216–22.  
34  
35 24 47 Keeler BD, Simpson JA, Ng O, *et al*. Randomized clinical trial of preoperative oral versus  
36 25 intravenous iron in anaemic patients with colorectal cancer. *Br J Surg* 2017;**104**:214–21.  
37  
38  
39 26  
40  
41 27  
42  
43  
44  
45  
46  
47  
48  
49  
50  
51  
52  
53  
54  
55  
56  
57  
58  
59  
60

1  
2  
3  
4  
5  
6  
7  
8  
9  
10  
11  
12  
13  
14  
15  
16  
17  
18  
19  
20  
21  
22  
23  
24  
25  
26  
27  
28  
29  
30  
31  
32  
33  
34  
35  
36  
37  
38  
39  
40  
41  
42  
43  
44  
45  
46  
47  
48  
49  
50  
51  
52  
53  
54  
55  
56  
57  
58  
59  
60

1

For peer review only



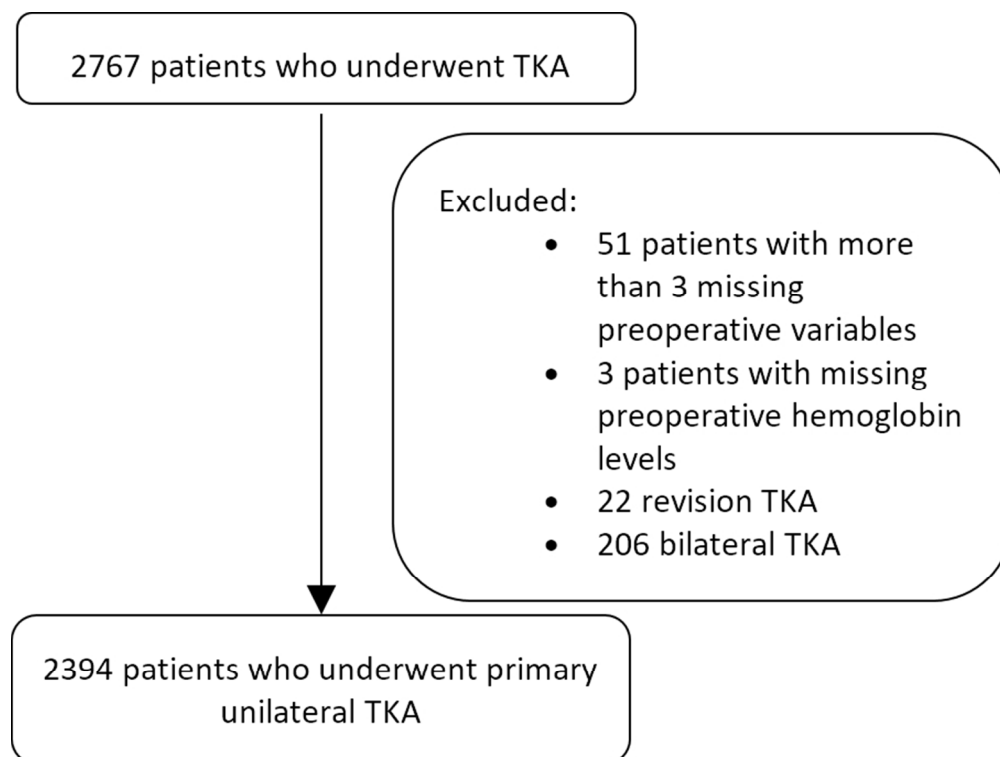

31  
32  
33  
34  
35  
36  
37  
38  
39  
40  
41  
42  
43  
44  
45  
46  
47  
48  
49  
50  
51  
52  
53  
54  
55  
56  
57  
58  
59  
60

Figure 1. Flowchart of study cohort derivation

76x57mm (300 x 300 DPI)

STROBE Statement—Checklist of items that should be included in reports of *cohort studies*

|                              | Page where<br>Item can be<br>found | Recommendation                                                                                                                                                                                    |
|------------------------------|------------------------------------|---------------------------------------------------------------------------------------------------------------------------------------------------------------------------------------------------|
| <b>Title</b>                 | 1                                  | (a) Indicate the study's design with a commonly used term in the title or the abstract                                                                                                            |
| <b>Abstract</b>              | 5                                  | (b) Provide in the abstract an informative and balanced summary of what was done and what was found                                                                                               |
| <b>Introduction</b>          |                                    |                                                                                                                                                                                                   |
| Background/rationale         | 7-8                                | Explain the scientific background and rationale for the investigation being reported                                                                                                              |
| Objectives                   | 8                                  | State specific objectives, including any prespecified hypotheses                                                                                                                                  |
| <b>Methods</b>               |                                    |                                                                                                                                                                                                   |
| Study design                 | 8-9                                | Present key elements of study design early in the paper                                                                                                                                           |
| Setting                      | 8-9                                | Describe the setting, locations, and relevant dates, including periods of recruitment, exposure, follow-up, and data collection                                                                   |
| Participants                 | 8-9                                | (a) Give the eligibility criteria, and the sources and methods of selection of participants. Describe methods of follow-up                                                                        |
|                              | NA                                 | (b) For matched studies, give matching criteria and number of exposed and unexposed                                                                                                               |
| Variables                    | 8-10                               | Clearly define all outcomes, exposures, predictors, potential confounders, and effect modifiers. Give diagnostic criteria, if applicable                                                          |
| Data sources/<br>measurement | 8-9                                | For each variable of interest, give sources of data and details of methods of assessment (measurement). Describe comparability of assessment methods if there is more than one group              |
| Bias                         | NA                                 | Describe any efforts to address potential sources of bias                                                                                                                                         |
| Study size                   | NA                                 | Explain how the study size was arrived at                                                                                                                                                         |
| Quantitative variables       | 10-11                              | Explain how quantitative variables were handled in the analyses. If applicable, describe which groupings were chosen and why                                                                      |
| Statistical methods          | 10-11                              | (a) Describe all statistical methods, including those used to control for confounding                                                                                                             |
|                              | 10-11                              | (b) Describe any methods used to examine subgroups and interactions                                                                                                                               |
|                              | 9                                  | (c) Explain how missing data were addressed                                                                                                                                                       |
|                              | NA                                 | (d) If applicable, explain how loss to follow-up was addressed                                                                                                                                    |
|                              | 11                                 | (e) Describe any sensitivity analyses                                                                                                                                                             |
| <b>Results</b>               |                                    |                                                                                                                                                                                                   |
| Participants                 | 9                                  | (a) Report numbers of individuals at each stage of study—eg numbers potentially eligible, examined for eligibility, confirmed eligible, included in the study, completing follow-up, and analysed |
|                              | 9                                  | (b) Give reasons for non-participation at each stage                                                                                                                                              |
|                              | 10                                 | (c) Consider use of a flow diagram                                                                                                                                                                |
| Descriptive data             | 9                                  | (a) Give characteristics of study participants (eg demographic, clinical, social) and information on exposures and potential confounders                                                          |
|                              | 9                                  | (b) Indicate number of participants with missing data for each variable of interest                                                                                                               |
|                              | NA                                 | (c) Summarise follow-up time (eg, average and total amount)                                                                                                                                       |
| Outcome data                 | 11-12                              | Report numbers of outcome events or summary measures over time                                                                                                                                    |
| Main results                 | 12-14                              | (a) Give unadjusted estimates and, if applicable, confounder-adjusted                                                                                                                             |

|                          |       |                                                                                                                                                                            |
|--------------------------|-------|----------------------------------------------------------------------------------------------------------------------------------------------------------------------------|
|                          |       | estimates and their precision (eg, 95% confidence interval). Make clear which confounders were adjusted for and why they were included                                     |
|                          | NA    | (b) Report category boundaries when continuous variables were categorized                                                                                                  |
|                          | NA    | (c) If relevant, consider translating estimates of relative risk into absolute risk for a meaningful time period                                                           |
| Other analyses           | 15    | Report other analyses done—eg analyses of subgroups and interactions, and sensitivity analyses                                                                             |
| <b>Discussion</b>        |       |                                                                                                                                                                            |
| Key results              | 14-17 | Summarise key results with reference to study objectives                                                                                                                   |
| Limitations              | 20    | Discuss limitations of the study, taking into account sources of potential bias or imprecision. Discuss both direction and magnitude of any potential bias                 |
| Interpretation           | 17-18 | Give a cautious overall interpretation of results considering objectives, limitations, multiplicity of analyses, results from similar studies, and other relevant evidence |
| Generalisability         | NA    | Discuss the generalisability (external validity) of the study results                                                                                                      |
| <b>Other information</b> |       |                                                                                                                                                                            |
| Funding                  | 21    | Give the source of funding and the role of the funders for the present study and, if applicable, for the original study on which the present article is based              |

\*Give information separately for exposed and unexposed groups.

# BMJ Open

## Association between preoperative anaemia with length of hospital stay among patients undergoing primary total knee arthroplasty in Singapore: A single centre retrospective study

|                                 |                                                                                                                                                                                                                                                                                                                                                                                                                                                                                                                                  |
|---------------------------------|----------------------------------------------------------------------------------------------------------------------------------------------------------------------------------------------------------------------------------------------------------------------------------------------------------------------------------------------------------------------------------------------------------------------------------------------------------------------------------------------------------------------------------|
| Journal:                        | <i>BMJ Open</i>                                                                                                                                                                                                                                                                                                                                                                                                                                                                                                                  |
| Manuscript ID                   | bmjopen-2017-016403.R2                                                                                                                                                                                                                                                                                                                                                                                                                                                                                                           |
| Article Type:                   | Research                                                                                                                                                                                                                                                                                                                                                                                                                                                                                                                         |
| Date Submitted by the Author:   | 13-Apr-2017                                                                                                                                                                                                                                                                                                                                                                                                                                                                                                                      |
| Complete List of Authors:       | abdullah, hairil; Singapore General Hospital, Department of Anesthesiology<br>Sim, Eileen; Singapore General Hospital, Department of Anaesthesiology<br>Ying, Hao; Singapore General Hospital, Health Services Research Unit<br>Lin, Gengyu; National University Singapore Yong Loo Lin School of Medicine<br>Liew, Geoffrey ; Singapore General Hospital, Department of Anaesthesiology<br>Lamoureux, Ecosse; Singapore Eye Research Institute<br>Tan, Mann Hong; Singapore General Hospital, Department of Orthopaedic Surgery |
| <b>Primary Subject Heading</b>: | Health services research                                                                                                                                                                                                                                                                                                                                                                                                                                                                                                         |
| Secondary Subject Heading:      | Haematology (incl blood transfusion), Surgery, Anaesthesia                                                                                                                                                                                                                                                                                                                                                                                                                                                                       |
| Keywords:                       | Anaemia < HAEMATOLOGY, ORTHOPAEDIC & TRAUMA SURGERY, HEALTH SERVICES ADMINISTRATION & MANAGEMENT, Blood bank & transfusion medicine < HAEMATOLOGY, Anaesthesia in orthopaedics < ANAESTHETICS                                                                                                                                                                                                                                                                                                                                    |
|                                 |                                                                                                                                                                                                                                                                                                                                                                                                                                                                                                                                  |

SCHOLARONE™  
Manuscripts

1  
2  
3 1 **Title:** Association between preoperative anaemia with length of hospital stay among patients  
4 2 undergoing primary total knee arthroplasty in Singapore: A single centre retrospective study  
5 3 Short Title: Preoperative anaemia, total knee arthroplasty  
6 4

7 5 **Running Head:**

8 6 Abdullah HR, Sim YE, Y Hao, Lin GY, Liew GHC, EL Lamoureux, Tan MH  
9 7

10 8 Hairil Rizal ABDULLAH (Corresponding author)

11 9 Department of Anesthesiology,

12 10 Singapore General Hospital

13 11 169608, Singapore

14 12 Hairil.rizal.abdullah@singhealth.com.sg  
15 13

16 14 Yilin Eileen SIM

17 15 Department of Anesthesiology

18 16 Singapore General Hospital,

19 17 169608, Singapore  
20 18

21 19 Ying HAO

22 20 Health Services Research Unit,

23 21 Singapore General Hospital

24 22 169608, Singapore  
25 23

26 24 Geng Yu LIN

27 25 Yong Loo Lin School of Medicine,

28 26 National University of Singapore  
29 27

30 28 Geoffrey Haw Chieh LIEW

31 29 Department of Anesthesiology

32 30 Singapore General Hospital

33 31 169608, Singapore  
34 32

35 33 Ecosse L LAMOUREUX

36 34 Duke-NUS Medical School

37 35 169857, Singapore  
38 36

39 37 Mann Hong TAN

40 38 Department of Orthopaedics

41 39 Singapore General Hospital

42 40 169608, Singapore  
43 41

44 42 Details of corresponding author

45 43 Email: Hairil.rizal.abdullah@singhealth.com.sg  
46  
47  
48  
49  
50  
51  
52  
53  
54  
55  
56  
57  
58  
59  
60

1  
2  
3  
4  
5  
6  
7  
8  
9  
10  
11  
12  
13  
14  
15  
16  
17  
18  
19  
20  
21  
22  
23  
24  
25  
26  
27  
28  
29  
30  
31  
32  
33  
34  
35  
36  
37  
38  
39  
40  
41  
42  
43  
44  
45  
46  
47  
48  
49  
50  
51  
52  
53  
54  
55  
56  
57  
58  
59  
60

- 1 Key words: Anemia; Arthroplasty, knee replacement; length of stay;
- 2 Number of Tables: 3
- 3 Conflict of Interest: None to declare
- 4 Financial support: None

For peer review only

## 1 Abstract

2

3 **Objectives:** Studies in western healthcare settings suggest that preoperative anaemia is  
4 associated with poor outcomes after elective orthopaedic surgery. We investigated the  
5 prevalence of preoperative anaemia among primary unilateral total knee arthroplasty patients in  
6 Singapore and its association with length of hospital stay (LOS), perioperative blood transfusion  
7 and hospital readmission rates.

8 **Methods:** Retrospective cohort study performed in a tertiary academic medical centre in  
9 Singapore, involving patients who underwent primary unilateral TKA between January 2013 to  
10 June 2014. Demographics, comorbidities, preoperative haemoglobin level (Hb), LOS and 30-  
11 day readmission data were collected. Anaemia was classified according to WHO definition.  
12 Prolonged LOS was defined as more than 6 days, which corresponds to >75th centile LOS of  
13 the data.

14 **Results:** We analysed 2394 patients. The prevalence of anaemia was 23.7%. 403 patients  
15 (16.8%) had mild anaemia and 164 patients (6.8%) had moderate to severe anaemia. Overall  
16 mean LOS was 5.4±4.8 days. Based on multivariate logistic regression, preoperative anaemia  
17 significantly increased LOS (mild anaemia, aOR 1.71, p<0.001; moderate/severe anaemia, aOR  
18 2.29, p<0.001). Similar effects were seen when preoperative anemia was defined by  
19 haemoglobin level below 13 g/dL, regardless of gender. Transfusion proportionately increased  
20 prolonged LOS (1 unit - aOR 2.12, p=0.006; 2 or more units - aOR 6.71, p<0.001). Repeat  
21 operation during hospital stay, previous cerebrovascular accidents, general anaesthesia and  
22 age>70 years were associated with prolonged LOS. Our 30-day related readmission rate was  
23 1.7% (42) cases.

24 **Conclusion:** Anaemia is common among patients undergoing elective total knee arthroplasty in  
25 Singapore and is independently associated with prolonged length of stay and increased  
26 perioperative blood transfusion. We suggest measures to correct anaemia prior to surgery,  
27 including the use of non-gender based haemoglobin cut-off for establishing diagnosis.

28

29

1  
2  
3 1 Word count: 278

4 2 Keywords: Anaemia; Arthroplasty, knee replacement; length of stay; perioperative blood  
5 transfusion, patient blood management  
6  
7

8 4

9 5  
10  
11  
12  
13  
14  
15  
16  
17  
18  
19  
20  
21  
22  
23  
24  
25  
26  
27  
28  
29  
30  
31  
32  
33  
34  
35  
36  
37  
38  
39  
40  
41  
42  
43  
44  
45  
46  
47  
48  
49  
50  
51  
52  
53  
54  
55  
56  
57  
58  
59  
60

For peer review only



**Strengths:**

- Our study provides a unique perspective from a South East Asian healthcare system on anaemia and its impact on LOS and hospital readmission rates after unilateral, primary total knee arthroplasty.
- We had minimal incomplete data (2.0%) due to the rigorous mandatory preoperative assessment database.
- We found comparable aOR of prolonged LOS using the WHO gender based definition of anaemia, which defines mild anemia in men to be hemoglobin concentration (Hb) between 11.0-12.9g/dL and in women to be 11.0-11.9g/dL, and a non-gender based definition which defines mild anemia as Hb 11.0-12.9 g/dL for both genders. Therefore, this lends weight to the recent proposition for a non-gender based cutoff of < 13.0g/dL in defining preoperative anaemia.
- Our study is one of the first to control for the day of the week the surgery was done, which was recently found to be a significant predictor for LOS in arthroplasties.

**Limitations:**

- This is a retrospective observational study, so it cannot establish a causal relationship between preoperative anaemia and adverse outcomes
- The selection of the 75th centile for defining prolonged LOS can be viewed as an arbitrary cut-off, although it is also used in other literature examining LOS after elective surgery.

**Introduction**

The prevalence of preoperative anaemia in patients undergoing non-cardiac surgery is considerably high, with rates of 30.4% and 28.7% recorded in the US and Europe

1  
2  
3 1 respectively.[1]. This is an important health problem as even mild anemia is associated with  
4 2 poor outcomes post-surgery [1, 3–6], including prolonged length of hospital stay (LOS) and  
5 3 higher readmission rates [7, 8] .

6  
7  
8 4 Total knee arthroplasty (TKA) is one of the most common orthopaedic procedures  
9 5 worldwide [2,3]. Due to the low mortality and morbidity rates associated with TKA, improvement  
10 6 initiatives have mainly focused on reducing LOS and improving functional recovery after surgery  
11 7 [4,5]. LOS associated with TKA is directly correlated with the total procedure cost, mainly due to  
12 8 provision of inpatient services [6,7]. Reductions in LOS can therefore help to reduce the  
13 9 economic burden of TKA [8,9]. Due to the fixed bed capacity, high overhead costs, and the  
14 10 Diagnosis-Related Group (DRG) reimbursement system in most health systems, the economic  
15 11 revenue of these systems depends on an increase in patient throughput by decreasing LOS.  
16 12 Additionally, unexpected prolonged LOS could negatively impact the patient's perspective of a  
17 13 good surgical outcome. Hence, it is important for health systems and physicians to identify  
18 14 modifiable risk factors that are associated with the improved recovery and discharge of these  
19 15 patients. Most studies examining the association between hospital LOS after joint arthroplasties  
20 16 and preoperative anaemia [10–17] were conducted within the western healthcare settings, with  
21 17 different demographics, potentially diverse discharge and rehabilitation policies from other  
22 18 regions in the world.

23 19 Therefore, in this study, we set out to investigate the relationship between preoperative  
24 20 anaemia and hospital LOS, perioperative blood transfusion as well as 30-day readmission rate  
25 21 among patients undergoing primary unilateral TKA in Singapore.

## 22 23 **Methods**

24 24 Institutional Review Board approval was obtained (Singhealth CIRB 2014/651/D) prior to  
25 25 the start of the study. The electronic medical records of all 2676 patients who underwent TKA  
26 26 between January 2013 and June 2014 in our institution were analysed. These clinical records  
27 27 were sourced from our institution's clinical information system (Sunrise Clinical Manager (SCM),  
28 28 Allscripts, IL, USA) and stored in our enterprise data repository and analytics system  
29 29 (SingHealth-IHiS Electronic Health Intelligence System - eHINTS), which integrates information

1  
2  
3 1 from administration, clinical and ancillary healthcare systems. We generated a list of patients  
4 2 who underwent total knee replacements from January 2013 to June 2014 using specific surgical  
5 3 codes relevant to this surgery. Information from SCM included patient demographics,  
6 4 preoperative comorbidities such as smoking, haemoglobin level, individual components of the  
7 5 Revised Risk Cardiac Index [18,19], such as a history of previous cerebrovascular accidents  
8 6 (CVA), ischemic heart disease (IHD), congestive cardiac failure (CCF), diabetes mellitus (DM)  
9 7 on insulin and elevated preoperative creatinine level >2mg/dL; ASA score [20]; details of the  
10 8 operation such as site, duration, type of anaesthesia and day of week the surgery was done  
11 9 [21]; perioperative blood transfusion and repeat surgeries during hospital stay were also  
12 10 obtained. The length of stay (LOS) was calculated from the date of admission, to the date of  
13 11 discharge from hospital to their home environment. 30-day readmission data after discharge  
14 12 was obtained from the clinical information system database, SCM. We filtered related  
15 13 readmission by the ICD-10 diagnosis, and further confirmed the cause of admission by looking  
16 14 up the patient's electronic medical records. We defined the window for preoperative  
17 15 haemoglobin levels to be taken at a maximum of 14 days and a minimum of one day before the  
18 16 surgery. We also defined perioperative blood transfusion to be within 2 weeks before up to 2  
19 17 weeks after the date of surgery.  
20 18

21 19 In our institution, most patients are admitted on the day of surgery and very infrequently,  
22 20 1 day earlier for medical and/or social reasons. Routinely, all anti-platelet medications apart  
23 21 from Aspirin are stopped for the recommended duration before the surgery. The use of  
24 22 intraoperative tranexamic acid infiltration to the knee joint, intravenous tranexamic acid and the  
25 23 placement of a drain into the joint after the surgery is not standardized. Use of cell salvage is  
26 24 rare. Postoperatively, all patients receive a standard hospital TKA protocol for postoperative  
27 25 care and discharge. This includes thromboembolism chemoprophylaxis with 40 mg once daily  
28 26 subcutaneous low molecular weight heparin (Clexane, Sanofi, Paris, France) on the first  
29 27 postoperative day, which is discontinued upon discharge. Patients also receive routine  
30 28 physiotherapy starting from the first postoperative day, even if it falls on the weekend. They are  
31 29 deemed fit for discharge when there is an agreement between the surgeon and physiotherapist

1 that the patient is medically stable and that their functional ability is sufficient to allow discharge  
2 to their home environment. This includes being able to climb up a few steps, transfer with the  
3 aid of a walking frame and to bend their operated knee close to 90 degrees.

4 After excluding 51 patients with more than 3 missing variables, 3 patients who did not  
5 have pre-operative haemoglobin levels, 22 patients who underwent revision surgery and 206  
6 patients who underwent bilateral surgery, we obtained 2394 patients in the final analysis (Figure  
7 1). No sensitivity analysis accounting for the missing data was done due to the small number  
8 (2.0%).

9  
10 The primary outcome was prolonged LOS, defined as more than 6 days. This cutoff was  
11 selected as it represents >75th centile LOS of the whole sample. The use of 75th centile to  
12 define prolonged LOS is consistent with other studies [22]. The secondary outcome was  
13 readmission for any reason within 30 days after surgery.

#### 14 15 Statistical analysis

16 We used the World Health Organisation (WHO)'s gender-based definition of anaemia  
17 severity [23]. Thus, mild anaemia was defined as haemoglobin concentration of 11-12.9g/dL in  
18 males and 11-11.9g/dL in females; moderate anaemia was defined for both genders to be  
19 haemoglobin concentration between 8-10.9g/dL and severe anaemia defined as haemoglobin  
20 concentration <8.0g/dL. Among the 567 patients (23.7%) with anaemia, 403 patients (16.8%)  
21 had mild preoperative anaemia, 159 patients (6.6%) had moderate anaemia and 5 patients had  
22 severe anaemia (0.2%). Due to the small incidence of severe anaemia in the sample, patients  
23 with moderate and severe anaemia were analyzed together.

24 Patient demographics and clinical characteristics were compared between LOS >6 and  
25  $\leq 6$  days (Table 1). For continuous variables, mean and standard deviation (SD) were presented  
26 and Mann-Whitney U test was used to test the mean differences between the 2 groups. For  
27 categorical variables, Chi-square test was used to compare the proportions between the 2  
28 groups. We categorized continuous variable such as age according to their broad centile  
29 groups, BMI according to the WHO definition of obesity, and operative duration according to

1 ≤100 minutes or > 100 minutes which corresponds to >75th centile of the data. Multivariate  
 2 logistic regression was performed to determine independent predictors for increased LOS  
 3 (Table 2) and perioperative blood transfusion (Table 3) while adjusting for demographic,  
 4 preoperative clinical risk factors and surgical factors. We repeated the logistic regression for  
 5 LOS with non-gender based cutoffs for anemia to see if it yielded significantly different results  
 6 from the WHO definition of anaemia. No anemia was defined as Hb ≥ 13.0g/dL, mild anemia as  
 7 Hb 11.0-12.9 g/dL and moderate/severe anemia as Hb < 11.0g/dL. Finally, we also constructed  
 8 General Linear Model (GLM) with our data, taking LOS and hemoglobin as continuous  
 9 variables, to assess the effect size of every unit rise in Hb on LOS. We found little presence of  
 10 collinearity between hemoglobin level and perioperative blood transfusion and their effect on  
 11 LOS based on linear regression. However, in our GLM model, the addition of perioperative  
 12 blood transfusion as a variable reduced the significance and effect size of preoperative  
 13 hemoglobin level, hence both models with and without perioperative blood transfusion were  
 14 performed and presented. All analyses were performed using IBM SPSS Statistics v21.

## 15 Results

16 **Results**  
 17 Table 1. Demographics of patients with normal Length of Stay (LOS) (≤ 6 days) versus those  
 18 with prolonged LOS (> 6 days) after Primary Unilateral Total Knee Replacement (TKR)

| Variable                    |           | Length of stay ≤ | Length of stay > | P-value |
|-----------------------------|-----------|------------------|------------------|---------|
|                             |           | 6 days<br>N=1933 | 6 days<br>N= 461 |         |
| <b>Patient demographics</b> |           |                  |                  |         |
| Age – mean (sd)             |           | 65.9 (8.0)       | 69.2 (8.6)       | <0.001  |
| Race – n (%)                | Chinese   | 1628 (84.2)      | 385 (83.5)       | 0.02    |
|                             | Malay     | 148 (7.7)        | 23 (5.0)         |         |
|                             | Indian    | 106 (5.5)        | 31 (6.7)         |         |
|                             | Others    | 51 (2.6)         | 22 (4.8)         |         |
| Body Mass Index –<br>n (%)  | < 25      | 555 (29.2)       | 138 (31.8)       | 0.16    |
|                             | 25 – 29.9 | 812 (42.7)       | 182 (41.9)       |         |
|                             | 30 – 34.9 | 410 (21.5)       | 77 (17.7)        |         |
|                             | ≥ 35      | 126 (6.6)        | 37 (8.5)         |         |
| Gender – n (%)              | Male      | 477 (24.7)       | 102 (22.1)       | 0.25    |

|                                               | Female          | 1456 (75.3) | 359 (77.9)  |        |
|-----------------------------------------------|-----------------|-------------|-------------|--------|
| <b>Details of Operation</b>                   |                 |             |             |        |
| Type of Anaesthesia – n (%)                   | GA              | 649 (33.6)  | 184 (39.9)  | 0.01   |
|                                               | RA              | 1284 (66.4) | 277 (60.1)  |        |
| Duration of operation – minutes (sd)          |                 | 79.6 (21.6) | 84.9 (27.5) | <0.001 |
| Perioperative Blood Transfusion – n (%)       | None            | 1879 (97.2) | 394 (85.5)  | <0.001 |
|                                               | 1 unit          | 43 (2.2)    | 37 (8.0)    |        |
|                                               | ≥ 2units        | 11 (0.6)    | 30 (6.5)    |        |
| Repeat Operation within Hospital Stay – n (%) | Yes             | 1 (0.1)     | 6 (1.3)     | <0.001 |
| Day of Week of Operation – n (%)              | Monday          | 307 (15.9)  | 90 (19.5)   | <0.001 |
|                                               | Tuesday         | 424 (21.9)  | 119 (25.8)  |        |
|                                               | Wednesday       | 326 (16.9)  | 84 (18.2)   |        |
|                                               | Thursday        | 472 (24.4)  | 63 (13.7)   |        |
|                                               | Friday          | 301 (15.6)  | 86 (18.7)   |        |
|                                               | Saturday        | 103 (5.3)   | 19 (4.1)    |        |
| <b>Patient comorbidities</b>                  |                 |             |             |        |
| Anaemia – n (%)                               | None            | 1537 (79.5) | 290 (62.9)  | <0.001 |
|                                               | Mild            | 294 (15.2)  | 109 (23.6)  |        |
|                                               | Moderate/Severe | 102 (5.3)   | 62 (13.4)   |        |
| DM on insulin – n (%)                         | Yes             | 30 (1.6)    | 11 (2.4)    | 0.22   |
| Creatinine > 2mg / dL – n (%)                 | Yes             | 9 (0.5)     | 9 (2.0)     | 0.001  |
| Previous CVA – n (%)                          | Yes             | 26 (1.3)    | 20 (4.3)    | <0.001 |
| IHD – n (%)                                   | Yes             | 89 (4.6)    | 39 (8.5)    | 0.001  |
| CCF – n (%)                                   | Yes             | 12 (0.6)    | 6 (1.3)     | 0.128  |
| Smoking – n (%)                               | Yes             | 184 (9.5)   | 43 (9.3)    | 0.90   |
| ASA                                           | 1               | 137 (7.1)   | 26 (5.6)    | <0.001 |
|                                               | 2               | 1699 (87.9) | 382 (82.9)  |        |
|                                               | 3               | 97 (5.0)    | 53 (11.5)   |        |

1  
2 **Table 2. Variables that predict increased Length of Stay (LOS) in Hospital after Primary**  
3 **Unilateral Total Knee Replacement, based on univariate and multivariate analysis.**

| Variable | OR ( 95% CI) | P-value | aOR (95% CI) | P-value |
|----------|--------------|---------|--------------|---------|
|----------|--------------|---------|--------------|---------|

| <b>Patient Demographics</b>             |           |                      |        |                      |        |
|-----------------------------------------|-----------|----------------------|--------|----------------------|--------|
| Age (years)                             | <60       | REF                  |        | REF                  |        |
|                                         | 60-64     | 0.95 (0.66, 1.37)    | 0.78   | 1.08 (0.73, 1.59)    | 0.71   |
|                                         | 65-69     | 1.37 (0.98, 1.92)    | 0.07   | 1.42 (0.98, 2.06)    | 0.06   |
|                                         | >70       | 2.04 (1.51, 2.75)    | <0.001 | 1.94 (1.38, 2.73)    | <0.001 |
| Race                                    | Malay     | 0.66 (0.42, 1.03)    | 0.07   | 0.53 (0.31, 0.92)    | 0.02   |
|                                         | Indian    | 1.24 (0.82, 1.87)    | 0.32   | 1.34 (0.85, 2.11)    | 0.21   |
|                                         | Others    | 1.82 (1.09, 3.04)    | 0.02   | 1.49 (0.83, 2.68)    | 0.19   |
|                                         | Chinese   | REF                  |        | REF                  |        |
| Body Mass Index                         | <25       | REF                  |        | REF                  |        |
|                                         | 25 – 29.9 | 0.90 (0.71, 1.15)    | 0.41   | 1.02 (0.78, 1.32)    | 0.91   |
|                                         | 30 – 34.9 | 0.76 (0.56, 1.03)    | 0.07   | 0.92 (0.65, 1.28)    | 0.61   |
|                                         | ≥ 35      | 1.18 (0.78, 1.78)    | 0.43   | 1.56 (0.96, 2.53)    | 0.07   |
| Gender                                  | Male      | REF                  |        | REF                  |        |
|                                         | Female    | 1.15 (0.90, 1.47)    | 0.25   | 1.20 (0.89, 1.63)    | 0.23   |
| <b>Details of Operation</b>             |           |                      |        |                      |        |
| Type of Anaesthesia                     | GA        | REF                  |        | REF                  |        |
|                                         | RA        | 0.76 (0.62, 0.94)    | 0.01   | 0.75 (0.59, 0.95)    | 0.02   |
| Duration of operation (minutes)         | ≤ 100     | REF                  |        | REF                  |        |
|                                         | > 100     | 1.41 (1.09, 1.84)    | 0.01   | 1.37 (1.03, 1.84)    | 0.03   |
| Perioperative Blood Transfusion (units) | None      | REF                  |        | REF                  |        |
|                                         | 1         | 4.10 (2.61, 6.45)    | <0.001 | 2.12 (1.24, 3.60)    | 0.006  |
|                                         | ≥ 2       | 13.01 (6.46, 26.17)  | <0.001 | 6.71 (3.14, 14.33)   | <0.001 |
| Repeat Operation within Hospital Stay   |           | 25.48 (3.06, 212.14) | 0.003  | 15.22 (1.38, 167.59) | 0.03   |
| Day of Week of Operation                | Monday    | 2.20 (1.54, 3.13)    | <0.001 | 2.38 (1.62, 3.49)    | <0.001 |
|                                         | Tuesday   | 2.10 (1.51, 2.93)    | <0.001 | 2.42 (1.68, 3.49)    | <0.001 |
|                                         | Wednesday | 1.93 (1.35, 2.76)    | <0.001 | 2.21 (1.50, 3.24)    | <0.001 |
|                                         | Thursday  | REF                  |        | REF                  |        |
|                                         | Friday    | 2.14 (1.50, 3.06)    | <0.001 | 1.99 (1.35, 2.94)    | 0.001  |
|                                         | Saturday  | 1.38 (0.79, 2.41)    | 0.25   | 1.46 (0.80, 2.67)    | 0.22   |
| <b>Patient comorbidities</b>            |           |                      |        |                      |        |

|                     |                 |                    |        |                   |        |
|---------------------|-----------------|--------------------|--------|-------------------|--------|
| Anaemia             | None            | REF                |        | REF               |        |
|                     | Mild            | 1.97 (1.53, 2.53)  | <0.001 | 1.71 (1.29, 2.27) | <0.001 |
|                     | Moderate/Severe | 3.22 (2.29, 4.53)  | <0.001 | 2.29 (1.54, 3.39) | <0.001 |
| DM on insulin       |                 | 1.55 (0.77, 3.12)  | 0.22   | 1.20 (0.53, 2.76) | 0.66   |
| Creatinine > 2mg/dL |                 | 4.26 (1.68, 10.78) | 0.002  | 2.35 (0.78, 7.11) | 0.13   |
| Previous CVA        |                 | 3.33 (1.84, 6.01)  | <0.001 | 2.89 (1.50, 5.55) | 0.001  |
| IHD                 |                 | 1.92 (1.30, 2.83)  | 0.001  | 1.50 (0.95, 2.36) | 0.08   |
| CCF                 |                 | 2.11 (0.79, 5.66)  | 0.14   | 1.19 (0.38, 3.75) | 0.77   |
| Smoking             |                 | 0.98 (0.69, 1.39)  | 0.90   | 1.15 (0.76, 1.75) | 0.50   |
| ASA Score           | 1               | REF                |        | REF               |        |
|                     | 2               | 1.19 (0.77, 1.83)  | 0.44   | 0.96 (0.61, 1.52) | 0.86   |
|                     | 3               | 2.88 (1.68, 4.92)  | <0.001 | 1.40 (0.77, 2.56) | 0.27   |

Legend: REF = reference

**Table 3. Factors associated with Perioperative Blood Transfusion after Primary Unilateral TKR**

| Variable                              | aOR (95% CI)*   | P-value              |
|---------------------------------------|-----------------|----------------------|
| Type of Anaesthesia                   | GA              | REF                  |
|                                       | RA              | 0.57 (0.37, 0.87)    |
| Duration of operation (minutes)       | ≤ 100           | REF                  |
|                                       | > 100           | 1.89 (1.14, 3.14)    |
| Repeat Operation within Hospital Stay |                 | 16.51 (2.22, 123.04) |
| Anaemia                               | None            | REF                  |
|                                       | Mild            | 4.13 (2.54, 6.71)    |
|                                       | Moderate/Severe | 9.13 (5.34, 15.61)   |
| ASA Score                             | 1               | REF                  |
|                                       | 2               | 2.08 (0.63, 6.90)    |
|                                       | 3               | 4.00 (1.05, 15.21)   |
| CCF                                   |                 | 7.71 (2.24, 26.53)   |

\* adjusted for all the variables listed in Table 1



1  
2  
3 1 Legend: REF = reference  
4 2

5 3 Demographics  
6

7 4 Of the 2394 patients who underwent primary TKA during the study period, 23.7% were anaemic.  
8  
9 5 403 patients (16.8%) had mild preoperative anaemia, 159 patients (6.6%) had moderate  
10 6 anaemia and 5 patients had severe anaemia (0.2%). In table 1, patients with prolonged LOS  
11 7 had higher mean age (69.2 years) compared to patients with normal LOS (65.9 years),  $p < 0.001$ .  
12 8 There was no significant difference in BMI or gender distribution between the two groups.  
13 9 However, those with prolonged LOS tended to have a higher ASA score ( $p < 0.001$ ), higher  
14 10 incidence of anaemia ( $p < 0.001$ ), previous CVA ( $p < 0.001$ ), undergo repeat operation within their  
15 11 hospital stay ( $p < 0.001$ ) and received general anaesthesia compared to regional anaesthesia  
16 12 ( $p < 0.01$ ).  
17  
18  
19  
20  
21  
22

23 14 Length of stay (LOS)  
24

25 15 The mean LOS for all TKA patients, was 5.4 days ( $\pm 4.8$  days), with a median of 4 days and 75<sup>th</sup>  
26 16 centile of 6 days. This result is similar to previous published LOS rates of primary unilateral TKA  
27 17 in our institution[24].  
28  
29  
30

31 19 461 patients (19.3%) had LOS more than six days (i.e prolonged LOS). Based on the  
32 20 multivariate analysis presented in table 2, the variables associated with independent elevated  
33 21 risk of prolonged LOS include older age  $> 70$  years (aOR 1.94,  $p < 0.001$ ), repeat surgery within  
34 22 LOS (aOR 15.22,  $p = 0.03$ ), having mild anaemia (aOR 1.71,  $p < 0.001$ ) or moderate/severe  
35 23 anaemia (aOR 2.29,  $p < 0.001$ ), and previous cerebrovascular accidents (CVA) (aOR 2.89,  
36 24  $p = 0.001$ ). Perioperative blood transfusion of 1 unit independently increased risk of prolonged  
37 25 LOS by 2.12 ( $p = 0.006$ ), while transfusion of 2 or more units independently increased risk by  
38 26 6.71 ( $p < 0.001$ ). Variables that reduced LOS include having regional anaesthesia (aOR 0.74,  
39 27  $p = 0.02$ ), having surgery on Thursday and being of Malay race. BMI, gender, presence of DM on  
40 28 insulin, previous diagnosis of ischemic heart disease, previous history of congestive heart failure  
41 29 or smoking, and elevated ASA scores were not associated with higher odds of prolonged LOS.  
42  
43  
44  
45  
46  
47  
48  
49  
50  
51  
52  
53  
54  
55  
56  
57  
58  
59  
60

We repeated multivariate logistic regression for LOS with the non-gender based hemoglobin cutoffs as described earlier. Compared to no anemia, mild anemia (Hb 11.0-12.9g/dL) had an aOR 1.39 (1.09, 1.76, p=0.007) while moderate/severe anemia (Hb < 11.0 g/dL) had an aOR of 2.35 (1.56, 3.54, p<0.001) of prolonged LOS (> 6 days). These results were comparable to the findings generated with WHO definition of anemia.

### Perioperative blood transfusion

Our overall transfusion rate was 5.0%. Factors that increased risk of perioperative blood transfusion (Table 3) included repeat operation during hospital stay (aOR 16.51, p=0.006), presence of mild anaemia (aOR 4.13, p<0.001) and moderate/severe anaemia (aOR 9.13, p<0.001), ASA score of 3 (aOR 4.00, p=0.04, and history of CCF (aOR 7.71, p=0.001). Regional anaesthesia was found to reduce risk of perioperative blood transfusion (aOR 0.57, p=0.009).

### Effect size of Hemoglobin on LOS

As shown in Table 4, when perioperative transfusion was excluded, every 1g increase in preoperative hemoglobin reduced LOS by 0.2 days (95% CI 0.08,0.34, p=0.002). However, after including perioperative transfusion, every 1g increase in preoperative hemoglobin reduced LOS minimally by 0.07 days (95% CI -0.20, 0.06, p=0.28).

Table 4. Effect size of every 1g increase in Hb, with and without factoring effect of perioperative blood transfusion based on General Linear Model

| Without adjusting for Perioperative Transfusion * |                                 |         |
|---------------------------------------------------|---------------------------------|---------|
| Hb Increase                                       | Incr in LOS in days<br>(95% CI) | P-value |
| 1g                                                | -0.21 (-0.34, -0.08)            | 0.002   |
| 2g                                                | -0.42 (-0.68, -0.16)            | 0.002   |
| 3g                                                | -0.63 (-1.01, -0.24)            | 0.002   |
| After adjusting for Perioperative Transfusion +   |                                 |         |
| Perioperative Transfusion                         | 0 units                         | REF     |

|                               |                     |        |
|-------------------------------|---------------------|--------|
| 1 unit                        | 4.02 (3.01, 5.03)   | <0.001 |
| ≥ 2 units                     | 8.35 (6.97, 9.73)   | <0.001 |
| Per unit increase in Hb by 1g | -0.07 (-0.20, 0.06) | 0.28   |

1 \* R<sup>2</sup> =0.114, adjusted R<sup>2</sup>=0.103

2 + R<sup>2</sup> = 0.182, adjusted R<sup>2</sup>=0.171

3 Legend: REF=reference

#### 5 Hospital readmission within 30 days

#### 6 Table 5. Causes of related admission within 30-days of discharge after primary unilateral TKR

| Causes of readmission         | N         |
|-------------------------------|-----------|
| Surgical site infection       | 13        |
| Pain/Swelling/Stiffness       | 11        |
| Non-infective Wound Discharge | 5         |
| Deep Vein Thrombosis          | 4         |
| Periprosthetic Fracture       | 3         |
| Hematoma/bleeding             | 2         |
| Erythema                      | 2         |
| Contact Dermatitis            | 1         |
| Wound Dehiscence              | 1         |
| <b>Grand Total</b>            | <b>42</b> |

8 We had 42 cases of related readmission within 30 days of discharge out of 2394 cases (1.7%)  
9 (Table 5). Due to the low rates of readmission, no further statistical analysis was done.

#### 11 **Discussion**

12 In this retrospective cohort study of 2394 consecutive patients who underwent elective  
13 unilateral primary TKA in our center, the prevalence of WHO-defined preoperative anaemia was  
14 23.7%. Patients with mild preoperative anaemia had an adjusted Odd Ratio (aOR) of prolonged  
15 LOS (> 6 days) of 1.71, while patients with moderate/severe anemia had an aOR of 2.29. Our  
16 findings are consistent with previous studies which show that preoperative anaemia  
17 independently increased LOS in “fast-track” knee arthroplasty [11] and in the “traditional

1 pathway” elective primary knee arthroplasty [25]. As these studies were done in the western  
2 world health systems and variations in practice and rehabilitation protocols between countries  
3 may lead to a wide disparity in postoperative hospital stays after TKA [26–29], our study  
4 provided a perspective from a South East Asian healthcare system. In countries with advanced  
5 healthcare systems and an ageing population, the exponentially increasing number of TKAs  
6 performed yearly [3] importunes that more effort is needed to identify modifiable risk factors for  
7 delayed hospital discharges.

8 Our study showed that every 1g increase in preoperative Hb reduced the patient’s LOS  
9 in hospital by 0.2 days. While this number is small, the presence of preoperative anemia is one  
10 of the strongest independent predictor of perioperative blood transfusion (mild anemia is  
11 associated with aOR of blood transfusion of 4.13,  $p < 0.001$ ; moderate severe anemia with aOR  
12 of transfusion of 9.13,  $p < 0.001$ ), which has a strong independent influence on prolonging LOS in  
13 our study. The transfusion of 1 unit of blood is associated with aOR of prolonged LOS of 2.12,  
14  $p = 0.006$ , while transfusion of 2 or more units has an aOR of 6.71,  $p < 0.001$ . Other studies have  
15 also found preoperative anaemia to be a strong predictor for perioperative allogeneic blood  
16 transfusion in knee surgeries[30,31], which is associated with poorer outcomes and prolonged  
17 LOS [11,32]. Thus, optimizing preoperative anemia becomes an important health care cost  
18 containment strategy, since TKAs are elective procedures that can be postponed to allow  
19 optimization of risk factors for suboptimal outcomes.

20 Our study adds to the growing body of publications from Asian countries on the negative  
21 impact of preoperative anemia on postoperative outcomes in orthopaedic and non-orthopaedic  
22 surgeries[33,34]. International guidelines now recommend patient blood management programs  
23 with early detection of preoperative anaemia to identify the cause and treat any underlying  
24 reversible causes, such as iron-deficiency anaemia[35]. Such intervention can reduce  
25 postoperative blood transfusion, LOS and readmission. In particular, iron deficiency anemia is  
26 amenable to administration of IV iron treatment. Froessler et al demonstrated that preoperative  
27 intravenous iron treatment of iron deficiency anaemia among patients who underwent major  
28 abdominal surgery resulted in reduction of median LOS by three days [36]. In the UK,  
29 preoperative iron supplementation prior to elective hip/knee arthroplasty has reduced

1  
2  
3 1 transfusion rates, 90-day readmission rates and halved median hospital LOS[37]. In Australia,  
4 2 transfusion rates have also been reduced since similar interventions for the same surgeries[38].  
5 3 Unfortunately in our institution, further evaluation and management of anaemia is often left to  
6 4 the ordering physician's discretion, and a more systematic approach to the detection and  
7 5 management of preoperative anaemia is timely.

8  
9  
10 6 We found comparable aOR of prolonged LOS using the WHO gender based definition of  
11 7 anaemia, which defines mild anemia in men to be between 11.0-12.9g/dL and that in women to  
12 8 be 11.0-11.9g/dL, and a non-gender based definition which defines mild anemia as Hb 11.0-  
13 9 12.9 g/dL for both genders. Therefore, this lends weight to the recent proposition for a non-  
14 10 gender based cutoff of < 13.0g/dL in defining preoperative anaemia for the purpose of Patient  
15 11 Blood Management initiatives.[39,40]

16  
17  
18 12 One of the aims of our study was to identify the risk factors for 30-day hospital  
19 13 readmission in our study population. However, we were unable to do so due to the small  
20 14 incidence of 42 readmissions out of 2349 cases, which precludes any meaningful analysis. Our  
21 15 30-day related readmission rates are similar to previous published rate in our institution, which  
22 16 is between 1.7-2.9% for primary unilateral TKR.[24]. This is lower than the 30-day all-cause  
23 17 readmission rates in literature of 4.0 -5.5% [41–43], because it only looks at readmission that is  
24 18 related to complications attributable to the surgery. Nevertheless, our readmission rates are  
25 19 similar to Schairer et al's 30-day surgical readmission rate of 2.4%, of which cellulitis and  
26 20 surgical site infection are the most common causes. In our study, surgical site infection was also  
27 21 the most common cause of readmission (31.1%).

### 22 23 Strengths of study

24  
25 24 One of the strengths of our study was that it is amongst the first few to control for the day  
26 25 of the week the surgery was done, which has recently been shown to affect LOS in TKA and  
27 26 total hip arthroplasty [21]. We found that having surgery on Thursday is significantly associated  
28 27 with the lowest odds of prolonged LOS. We postulate that this is because patients would have  
29 28 received standard physiotherapy for at least two days, on Friday and Saturday, and may be  
30 29 inclined to go home on Sunday where there is more familial support at home.

1  
2  
3 1 Another strength of our study is that we included both subjective measures of clinical risk  
4 2 estimates such as the ASA score [27,43], as well as the components of the RCRI which  
5 3 comprise of diagnosis of specific conditions. This allowed us to find that out of the 5 clinical  
6 4 conditions within the RCRI score, only a history of previous CVA was significantly associated  
7 5 with increased LOS (aOR 2.89, p=0.001). Furthermore, a history of CCF was found to be  
8 6 associated with increased risk of perioperative blood transfusion (aOR 7.71, p=0.001).

9  
10 7 Finally, we focused our study on patients who underwent primary total knee arthroplasty  
11 8 rather than combining hip and knee arthroplasty together, which is more commonly done in  
12 9 literature, as we wanted a more homogenous study population. We excluded revision and  
13 10 bilateral TKA as they are known in literature to be associated with increased need for blood  
14 11 transfusion and LOS.[44,45].

15 12 Our study recruitment occurred over 1.5 years. Our recruitment period is similar to  
16 13 another study published on this topic, which recruited over a 2 year period[11]. We feel that this  
17 14 is an advantage as no major changes in health care and discharge policy occurred during this  
18 15 short time frame that would influence our primary outcome of LOS.

#### 16 17 Limitations of study

18 18 We also had a modest study cohort of 2349 patients which is comparable to other  
19 19 studies [11,41]. While our study was performed retrospectively, it had minimal missing data  
20 20 (2.0%). This may be due to the fact that our clinical data, such as the preoperative variables,  
21 21 were collected electronically in a mandatory, prospective manner during routine preoperative  
22 22 anaesthesia assessment. Due to the observational nature of the study, a causal relationship  
23 23 between preoperative anaemia and adverse outcomes is difficult to establish. In addition, while  
24 24 our selection of the 75th centile for defining prolonged LOS can be viewed as an arbitrary cut-off  
25 25 in the absence of a universal definition of prolonged LOS, the use of 75th centile has been done  
26 26 in literature before for a similar study [22]. We do not have data on whether drains were placed  
27 27 by the surgeons during the surgery, however, a recent study done in the same institution  
28 28 showed that while drains were associated with a larger drop in Hb level and greater total blood  
29 29 loss, it did not significantly impact blood transfusion rate, LOS or 30-day readmission rates[24].

1  
2  
3 1 We also did not have data on the prevalence of the use of intraoperative tranexamic acid  
4 2 infiltration into the joint, administration of IV tranexamic acid by the anesthesiologists, or use of  
5 3 leucodepleted blood products for transfusion. Non-leucodepleted blood has been postulated to  
6 4 reduce transfusion related immunomodulatory (TRIM) effects including mortality[46], although  
7 5 clinical studies in cardiac surgery have not proven to be conclusive so far[47,48].  
8  
9  
10  
11  
12

### 13 Conclusion

14 8 In conclusion, we found the prevalence of preoperative anaemia to be 23.7% among  
15 9 patients who underwent primary total knee arthroplasty in Singapore. It was an independent risk  
16 10 factor for prolonged length of hospital stay and perioperative blood transfusion. We suggest  
17 11 measures to correct anaemia prior to surgery, including the use of non-gender based  
18 12 haemoglobin cut-off for establishing diagnosis.  
19  
20  
21  
22  
23

### 24 **Acknowledgements**

25 15 We would like to thank Ms Serene Ong, Academic Medicine Research Institute, Duke-NUS  
26 16 Medical School, for her help in manuscript preparation. We also like to thank Ms Sudha  
27 17 Hari Krishnan, from the Department of Anaesthesiology, for her invaluable help in data  
28 18 extraction. This research received no specific grant from any funding agency in the public,  
29 19 commercial or not-for-profit sectors.

30 20 Lastly, we would also like to thank Dr Chan Yiong Huak, Head, Biostatistics Unit, Yong Loo Lin  
31 21 School of Medicine, National University of Singapore, National University Health System,  
32 22 Singapore for his invaluable help in data analysis and interpretation.  
33  
34  
35  
36  
37  
38  
39

### 40 **Contributorship statement**

41 25 Abdullah HR - Contributed to the study conception and design, data acquisition, analysis and  
42 26 interpretation, drafting and final approval of the manuscript.

43 27 Sim YE – Contributed to data analysis and interpretation, drafting, revision and final approval of  
44 28 the manuscript

45 29 Y Hao – Contributed to data analysis and interpretation, drafting of the manuscript and final

1 approval

2 Lin GY – Contributed to data acquisition, analysis and interpretation, drafting of the manuscript  
3 and final approval

4 Liew GHC - Contributed to the study conception and design, data analysis, revision of the  
5 manuscript and final approval

6 EL Lamoureux – Contributed to data analysis and critical appraisal, revision and final approval  
7 of the manuscript.

8 MH Tan – Contributed to the study conception and design, drafting of manuscript and final  
9 approval.

10

11

## 12 **Competing interests**

13 No conflicts of interest to declare.

14

## 15 **Funding**

16 This research was funded by the hospital department funds.

17

## 18 **Data Sharing**

19 Full dataset can be downloaded from <http://dx.doi.org/10.5061/dryad.73250/1>

20

## 21 **Figure Legends**

22 Figure 1. TKA – total knee arthroplasty

23

24

25

26

27

28

29



1  
2  
3  
4  
5  
6  
7  
8  
9  
10  
11  
12  
13  
14  
15  
16  
17  
18  
19  
20  
21  
22  
23  
24  
25  
26  
27  
28  
29  
30  
31  
32  
33  
34  
35  
36  
37  
38  
39  
40  
41  
42  
43  
44  
45  
46  
47  
48  
49  
50  
51  
52  
53  
54  
55  
56  
57  
58  
59  
60

1

For peer review only

## 1 References

- 2 1 Baron DM, Hochrieser H, Posch M, *et al.* Preoperative anaemia is associated with poor  
3 clinical outcome in non-cardiac surgery patients. *Br J Anaesth* 2014;**113**:416–23.
- 4 2 HCUPnet: A tool for identifying, tracking, and analyzing national hospital statistics.  
5 <http://hcupnet.ahrq.gov/> (accessed 15 Aug2016).
- 6 3 Maradit Kremers H, Larson DR, Crowson CS, *et al.* Prevalence of Total Hip and Knee  
7 Replacement in the United States. *J Bone Joint Surg Am* 2015;**97**:1386–97.
- 8 4 den Hertog A, Gliesche K, Timm J, *et al.* Pathway-controlled fast-track rehabilitation after  
9 total knee arthroplasty: a randomized prospective clinical study evaluating the recovery  
10 pattern, drug consumption, and length of stay. *Arch Orthop Trauma Surg* 2012;**132**:1153–  
11 63.
- 12 5 Husted H, Jensen CM, Solgaard S, *et al.* Reduced length of stay following hip and knee  
13 arthroplasty in Denmark 2000–2009: from research to implementation. *Arch Orthop Trauma*  
14 *Surg* 2011;**132**:101–4.
- 15 6 Healy WL, Rana AJ, Iorio R. Hospital economics of primary total knee arthroplasty at a  
16 teaching hospital. *Clin Orthop Relat Res* 2011;**469**:87–94.
- 17 7 Lovald ST, Ong KL, Malkani AL, *et al.* Complications, mortality, and costs for outpatient and  
18 short-stay total knee arthroplasty patients in comparison to standard-stay patients. *J*  
19 *Arthroplasty* 2014;**29**:510–5.
- 20 8 Kim S, Losina E, Solomon DH, *et al.* Effectiveness of clinical pathways for total knee and  
21 total hip arthroplasty Literature review. *J Arthroplasty* 2003/1;**18**:69–74.
- 22 9 Ayalon O, Liu S, Flics S, *et al.* A multimodal clinical pathway can reduce length of stay after  
23 total knee arthroplasty. *HSS J* 2011;**7**:9–15.
- 24 10 Liodakis E, Bergeron SG, Zukor DJ, *et al.* Perioperative Complications and Length of Stay  
25 After Revision Total Hip and Knee Arthroplasties: An Analysis of the NSQIP Database. *J*  
26 *Arthroplasty* 2015;**30**:1868–71.
- 27 11 Jans Ø, Jørgensen C, Kehlet H, *et al.* Role of preoperative anemia for risk of transfusion  
28 and postoperative morbidity in fast-track hip and knee arthroplasty. *Transfusion*  
29 2014;**54**:717–26.
- 30 12 Bs JV, Gomez MM, Restrepo C, *et al.* Preoperative Anemia Increases Postoperative  
31 Complications and Mortality Following Total Joint Arthroplasty. *J Arthroplasty*; **30**:846–8.

- 1  
2  
3 1 13 Chamieh JS, Tamim HM, Masrouha KZ, *et al.* The Association of Anemia and Its Severity  
4 2 with Cardiac Outcomes and Mortality After Total Knee Arthroplasty in Noncardiac Patients.  
5 3 *J Arthroplasty* 2016;**31**:766–70.  
6  
7 4 14 Jans Ø, Jørgensen C, Kehlet H, *et al.* Role of preoperative anemia for risk of transfusion  
8 5 and postoperative morbidity in fast-track hip and knee arthroplasty. *Transfusion* Published  
9 6 Online First: 2014.<http://onlinelibrary.wiley.com/doi/10.1111/trf.12332/full>  
10  
11 7 15 Pitter FT, Jørgensen CC, Lindberg-Larsen M, *et al.* Postoperative Morbidity and Discharge  
12 8 Destinations After Fast-Track Hip and Knee Arthroplasty in Patients Older Than 85 Years.  
13 9 *Anesth Analg* 2016;**122**:1807–15.  
14  
15 10 16 Greenky M, Gandhi K, Pulido L, *et al.* Preoperative anemia in total joint arthroplasty: is it  
16 11 associated with periprosthetic joint infection? *Clin Orthop Relat Res* 2012;**470**:2695–701.  
17  
18 12 17 Husted H, Holm G, Jacobsen S. Predictors of length of stay and patient satisfaction after  
19 13 hip and knee replacement surgery: fast-track experience in 712 patients. *Acta Orthop*  
20 14 2008;**79**:168–73.  
21  
22 15 18 Fleisher LA, Fleischmann KE, Auerbach AD, *et al.* 2014 ACC/AHA guideline on  
23 16 perioperative cardiovascular evaluation and management of patients undergoing  
24 17 noncardiac surgery: executive summary: a report of the American College of  
25 18 Cardiology/American Heart Association Task Force on Practice Guidelines. *Circulation*  
26 19 2014;**130**:2215–45.  
27  
28 20 19 Lee TH, Marcantonio ER, Mangione CM, *et al.* Derivation and prospective validation of a  
29 21 simple index for prediction of cardiac risk of major noncardiac surgery. *Circulation*  
30 22 1999;**100**:1043–9.  
31  
32 23 20 American Society of Anesthesiologists - ASA Physical Status Classification System.  
33 24 [https://www.asahq.org/resources/clinical-information/asa-physical-status-classification-](https://www.asahq.org/resources/clinical-information/asa-physical-status-classification-system)  
34 25 [system](https://www.asahq.org/resources/clinical-information/asa-physical-status-classification-system) (accessed 11 Jul2016).  
35  
36 26 21 Newman JM, Szubski CR, Barsoum WK, *et al.* Day of Surgery Affects Length of Stay and  
37 27 Charges in Primary Total Hip and Knee Arthroplasty. *J Arthroplasty* Published Online First:  
38 28 29 June 2016. doi:10.1016/j.arth.2016.06.032  
39  
40 29 22 Almashrafi A, Alsabti H, Mukaddirov M, *et al.* Factors associated with prolonged length of  
41 30 stay following cardiac surgery in a major referral hospital in Oman: a retrospective  
42 31 observational study. *BMJ Open* 2016;**6**:e010764.  
43  
44 32 23 Health Organization W. Nutritional anaemias: report of a WHO scientific group [meeting  
45 33 held in Geneva from 13 to 17 March 1967]. Published Online First:  
46 34 1968.<http://apps.who.int/iris/handle/10665/40707>  
47  
48  
49  
50  
51  
52  
53  
54  
55  
56  
57  
58  
59  
60

- 1  
2  
3 1 24 Chen JY, Lee WC, Chan HY, *et al.* Drain use in total knee arthroplasty is neither associated  
4 2 with a greater transfusion rate nor a longer hospital stay. *Int Orthop* 2016;**40**:2505–9.  
5
- 6 3 25 Smith IDM, Elton R, Ballantyne JA, *et al.* Pre-operative predictors of the length of hospital  
7 4 stay in total knee replacement. *J Bone Joint Surg Br* 2008;**90**:1435–40.  
8
- 9 5 26 Monsef JB, Della Valle AG, Mayman DJ, *et al.* The impact of blood management on length  
10 6 of stay after primary total knee arthroplasty. *Open Orthop J* 2014;**8**:108–13.  
11
- 12 7 27 Vorhies JS, Wang Y, Herndon JH, *et al.* Decreased length of stay after TKA is not  
13 8 associated with increased readmission rates in a national Medicare sample. *Clin Orthop  
14 9 Relat Res* 2012;**470**:166–71.  
15
- 16 10 28 Krämer S, Wenk M, Fischer G, *et al.* Continuous spinal anesthesia versus continuous  
17 11 femoral nerve block for elective total knee replacement. *Minerva Anesthesiol* 2011;**77**:394–  
18 12 400.  
19
- 20 13 29 Dauty M, Smitt X, Menu P, *et al.* Which factors affect the duration of inpatient rehabilitation  
21 14 after total knee arthroplasty in the absence of complications? *Ann Phys Rehabil Med*  
22 15 2009;**52**:234–45.  
23
- 24 16 30 Salido JA, Marín LA, Gómez LA, *et al.* Preoperative hemoglobin levels and the need for  
25 17 transfusion after prosthetic hip and knee surgery: analysis of predictive factors. *J Bone  
26 18 Joint Surg Am* 2002;**84-A**:216–20.  
27
- 28 19 31 Carling MS, Jeppsson A, Eriksson BI, *et al.* Transfusions and blood loss in total hip and  
29 20 knee arthroplasty: a prospective observational study. *J Orthop Surg Res* 2015;**10**:48.  
30
- 31 21 32 Whitlock EL, Kim H, Auerbach AD. Harms associated with single unit perioperative  
32 22 transfusion: retrospective population based analysis. *BMJ* 2015;**350**:h3037.  
33
- 34 23 33 Jung D-H, Lee H-J, Han D-S, *et al.* Impact of perioperative hemoglobin levels on  
35 24 postoperative outcomes in gastric cancer surgery. *Gastric Cancer* 2013;**16**:377–82.  
36
- 37 25 34 Zhang L, Yin P, Lv H, *et al.* Anemia on Admission Is an Independent Predictor of Long-  
38 26 Term Mortality in Hip Fracture Population: A Prospective Study With 2-Year Follow-Up.  
39 27 *Medicine* 2016;**95**:e2469.  
40
- 41 28 35 Goodnough LT, Maniatis A, Earnshaw P, *et al.* Detection, evaluation, and management of  
42 29 preoperative anaemia in the elective orthopaedic surgical patient: NATA guidelines. *Br J  
43 30 Anaesth* 2011;**106**:13–22.  
44
- 45 31 36 Froessler B, Palm P, Weber I, *et al.* The Important Role for Intravenous Iron in  
46 32 Perioperative Patient Blood Management in Major Abdominal Surgery: A Randomized  
47 33 Controlled Trial. *Ann Surg* 2016;**264**:41–6.  
48  
49  
50  
51  
52  
53  
54  
55  
56  
57  
58  
59

- 1  
2  
3 1 37 Frew N, Alexander D, Hood J, *et al.* Impact of a blood management protocol on transfusion  
4 2 rates and outcomes following total hip and knee arthroplasty. *Ann R Coll Surg Engl*  
5 3 2016;**98**:380–6.  
6  
7 4 38 Kopanidis P, Hardidge A, McNicol L, *et al.* Perioperative blood management programme  
8 5 reduces the use of allogenic blood transfusion in patients undergoing total hip and knee  
9 6 arthroplasty. *J Orthop Surg Res* 2016;**11**:28.  
10  
11 7 39 Muñoz M, Gómez-Ramírez S, Kozek-Langeneker S, *et al.* 'Fit to fly': overcoming barriers to  
12 8 preoperative haemoglobin optimization in surgical patients. *Br J Anaesth* 2015;**115**:15–24.  
13  
14 9 40 Muñoz M, Acheson AG, Auerbach M, *et al.* International consensus statement on the peri-  
15 10 operative management of anaemia and iron deficiency. *Anaesthesia* 2017;**72**:233–47.  
16  
17 11 41 Schairer WW, Vail TP, Bozic KJ. What are the rates and causes of hospital readmission  
18 12 after total knee arthroplasty? *Clin Orthop Relat Res* 2014;**472**:181–7.  
19  
20 13 42 Brown NM, Sheth NP, Davis K, *et al.* Total knee arthroplasty has higher postoperative  
21 14 morbidity than unicompartmental knee arthroplasty: a multicenter analysis. *J Arthroplasty*  
22 15 2012;**27**:86–90.  
23  
24 16 43 Huddleston JI, Maloney WJ, Wang Y, *et al.* Adverse events after total knee arthroplasty: a  
25 17 national Medicare study. *J Arthroplasty* 2009;**24**:95–100.  
26  
27 18 44 Callaghan JJ, Spitzer AI. Blood management and patient specific transfusion options in  
28 19 total joint replacement surgery. *Iowa Orthop J* 2000;**20**:36–45.  
29  
30 20 45 Robinson S, McGonigle O, Volin S, *et al.* Comprehensive Look at Blood Transfusion  
31 21 Utilization in Total Joint Arthroplasty at a Single Academic Medical Center under a Single  
32 22 Surgeon. *J Blood Transfus* 2013;**2013**:983250.  
33  
34 23 46 FAQ: Leucodepletion of red cells and platelets from Australian Red Cross Blood Service.  
35 24 [https://www.transfusion.com.au/blood\\_products/components/leucodepletion](https://www.transfusion.com.au/blood_products/components/leucodepletion) (accessed 16  
36 25 Mar2017).  
37  
38 26 47 Murphy GJ, Reeves BC, Rogers CA, *et al.* Increased mortality, postoperative morbidity, and  
39 27 cost after red blood cell transfusion in patients having cardiac surgery. *Circulation*  
40 28 2007;**116**:2544–52.  
41  
42 29 48 McQuilten ZK, Andrianopoulos N, van de Watering L, *et al.* Introduction of universal  
43 30 prestorage leukodepletion of blood components, and outcomes in transfused cardiac  
44 31 surgery patients. *J Thorac Cardiovasc Surg* 2015;**150**:216–22.  
45  
46  
47  
48  
49  
50  
51  
52  
53  
54  
55  
56  
57  
58  
59  
60

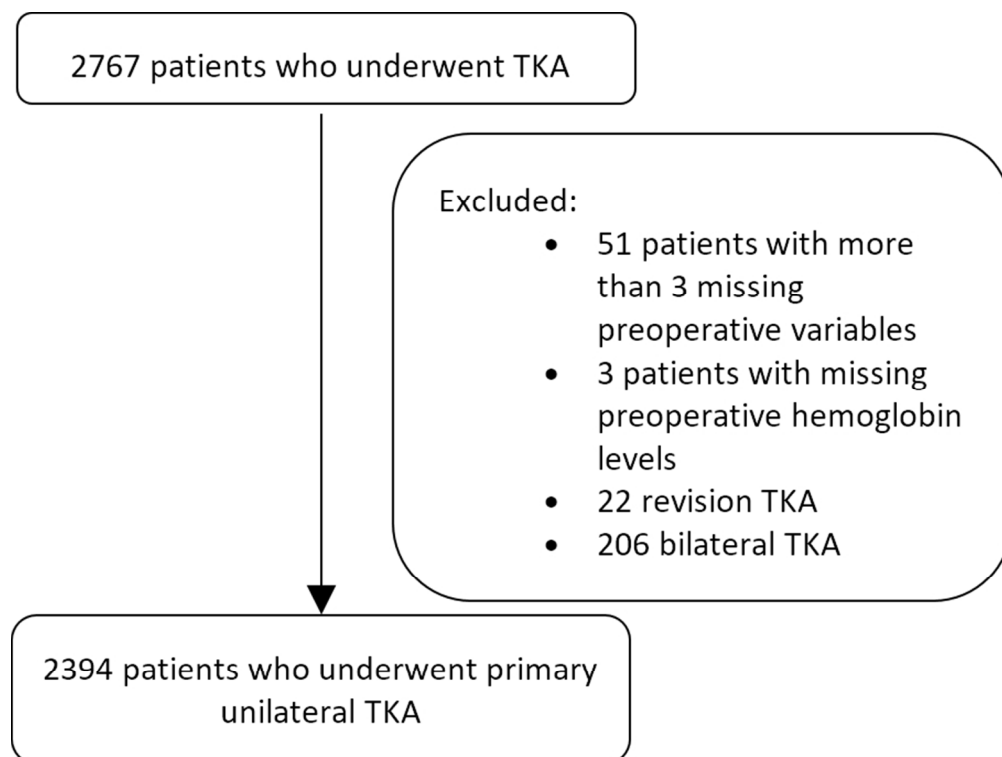

31  
32  
33  
34  
35  
36  
37  
38  
39  
40  
41  
42  
43  
44  
45  
46  
47  
48  
49  
50  
51  
52  
53  
54  
55  
56  
57  
58  
59  
60

Figure 1. Flowchart of study cohort derivation

76x57mm (300 x 300 DPI)

STROBE Statement—Checklist of items that should be included in reports of *cohort studies*

|                              | Page where<br>Item can be<br>found | Recommendation                                                                                                                                                                                    |
|------------------------------|------------------------------------|---------------------------------------------------------------------------------------------------------------------------------------------------------------------------------------------------|
| <b>Title</b>                 | 1                                  | (a) Indicate the study's design with a commonly used term in the title or the abstract                                                                                                            |
| <b>Abstract</b>              | 5                                  | (b) Provide in the abstract an informative and balanced summary of what was done and what was found                                                                                               |
| <b>Introduction</b>          |                                    |                                                                                                                                                                                                   |
| Background/rationale         | 7-8                                | Explain the scientific background and rationale for the investigation being reported                                                                                                              |
| Objectives                   | 8                                  | State specific objectives, including any prespecified hypotheses                                                                                                                                  |
| <b>Methods</b>               |                                    |                                                                                                                                                                                                   |
| Study design                 | 8-9                                | Present key elements of study design early in the paper                                                                                                                                           |
| Setting                      | 8-9                                | Describe the setting, locations, and relevant dates, including periods of recruitment, exposure, follow-up, and data collection                                                                   |
| Participants                 | 8-9                                | (a) Give the eligibility criteria, and the sources and methods of selection of participants. Describe methods of follow-up                                                                        |
|                              | NA                                 | (b) For matched studies, give matching criteria and number of exposed and unexposed                                                                                                               |
| Variables                    | 8-10                               | Clearly define all outcomes, exposures, predictors, potential confounders, and effect modifiers. Give diagnostic criteria, if applicable                                                          |
| Data sources/<br>measurement | 8-9                                | For each variable of interest, give sources of data and details of methods of assessment (measurement). Describe comparability of assessment methods if there is more than one group              |
| Bias                         | NA                                 | Describe any efforts to address potential sources of bias                                                                                                                                         |
| Study size                   | NA                                 | Explain how the study size was arrived at                                                                                                                                                         |
| Quantitative variables       | 10-11                              | Explain how quantitative variables were handled in the analyses. If applicable, describe which groupings were chosen and why                                                                      |
| Statistical methods          | 10-11                              | (a) Describe all statistical methods, including those used to control for confounding                                                                                                             |
|                              | 10-11                              | (b) Describe any methods used to examine subgroups and interactions                                                                                                                               |
|                              | 9                                  | (c) Explain how missing data were addressed                                                                                                                                                       |
|                              | NA                                 | (d) If applicable, explain how loss to follow-up was addressed                                                                                                                                    |
|                              | 11                                 | (e) Describe any sensitivity analyses                                                                                                                                                             |
| <b>Results</b>               |                                    |                                                                                                                                                                                                   |
| Participants                 | 9                                  | (a) Report numbers of individuals at each stage of study—eg numbers potentially eligible, examined for eligibility, confirmed eligible, included in the study, completing follow-up, and analysed |
|                              | 9                                  | (b) Give reasons for non-participation at each stage                                                                                                                                              |
|                              | 10                                 | (c) Consider use of a flow diagram                                                                                                                                                                |
| Descriptive data             | 9                                  | (a) Give characteristics of study participants (eg demographic, clinical, social) and information on exposures and potential confounders                                                          |
|                              | 9                                  | (b) Indicate number of participants with missing data for each variable of interest                                                                                                               |
|                              | NA                                 | (c) Summarise follow-up time (eg, average and total amount)                                                                                                                                       |
| Outcome data                 | 11-12                              | Report numbers of outcome events or summary measures over time                                                                                                                                    |
| Main results                 | 12-14                              | (a) Give unadjusted estimates and, if applicable, confounder-adjusted                                                                                                                             |

|                          |       |                                                                                                                                                                            |
|--------------------------|-------|----------------------------------------------------------------------------------------------------------------------------------------------------------------------------|
|                          |       | estimates and their precision (eg, 95% confidence interval). Make clear which confounders were adjusted for and why they were included                                     |
|                          | NA    | (b) Report category boundaries when continuous variables were categorized                                                                                                  |
|                          | NA    | (c) If relevant, consider translating estimates of relative risk into absolute risk for a meaningful time period                                                           |
| Other analyses           | 15    | Report other analyses done—eg analyses of subgroups and interactions, and sensitivity analyses                                                                             |
| <b>Discussion</b>        |       |                                                                                                                                                                            |
| Key results              | 14-17 | Summarise key results with reference to study objectives                                                                                                                   |
| Limitations              | 20    | Discuss limitations of the study, taking into account sources of potential bias or imprecision. Discuss both direction and magnitude of any potential bias                 |
| Interpretation           | 17-18 | Give a cautious overall interpretation of results considering objectives, limitations, multiplicity of analyses, results from similar studies, and other relevant evidence |
| Generalisability         | NA    | Discuss the generalisability (external validity) of the study results                                                                                                      |
| <b>Other information</b> |       |                                                                                                                                                                            |
| Funding                  | 21    | Give the source of funding and the role of the funders for the present study and, if applicable, for the original study on which the present article is based              |

\*Give information separately for exposed and unexposed groups.
